1 **Assessing whitefly diversity to infer about begomovirus dynamics in cassava in Brazil**

2

3 César A.D. Xavier<sup>1&</sup>, Angélica M. Nogueira<sup>1e</sup>, Vinícius H. Bello<sup>2</sup>, Luís F. M. Watanabe<sup>2</sup>,  
4 Miguel Alves-Júnior<sup>3</sup>, Leonardo F. Barbosa<sup>4</sup>, José E.A. Beserra-Junior<sup>5</sup>, Alessandra J. Boari<sup>6</sup>,  
5 Renata F. Calegario<sup>7</sup>, Eduardo S. Gorayeb<sup>8</sup>, Jaime Honorato-Júnior<sup>9</sup>, Gabriel Koch<sup>7</sup>, Gaus S.A.  
6 Lima<sup>10</sup>, Cristian A. Lopes<sup>4</sup>, Raquel N. Mello<sup>11</sup>, Késsia F. C. Pantoja<sup>6</sup>, Fabio N. Silva<sup>8</sup>, Roberto  
7 Ramos-Sobrinho<sup>10#</sup>, Enilton N. Santana<sup>12</sup>, José W.P. Silva<sup>13</sup>, Renate Krause-Sakate<sup>2\*</sup>, F.M.  
8 Zerbini<sup>1\*</sup>

9

10 <sup>1</sup> Dep. de Fitopatologia/BIOAGRO, Universidade Federal de Viçosa, Viçosa, MG 36570-900,  
11 Brazil

12 <sup>2</sup> Dep. de Proteção Vegetal, Universidade Estadual Paulista Júlio de Mesquita Filho, UNESP-  
13 FCA, Botucatu, SP 18610-034, Brazil

14 <sup>3</sup> Lab. de Fitopatologia Agrícola e Florestal, Faculdade de Engenharia Agrônômica,  
15 Universidade Federal do Pará, Altamira, PA 68372-040, Brazil

16 <sup>4</sup> Instituto Federal do Sudeste de Minas Gerais, Campus Rio Pomba, Rio Pomba, MG 36180-  
17 000, Brazil

18 <sup>5</sup> Dep. de Fitotecnia, Universidade Federal do Piauí, Teresina, PI 64049-518, Brazil

19 <sup>6</sup> Embrapa Amazônia Oriental, Belém, PA 66095-903, Brazil

20 <sup>7</sup> Dep. de Fitotecnia e Fitossanidade, Universidade Federal do Paraná, Curitiba, PR 80035-250,  
21 Brazil

22 <sup>8</sup> Centro de Ciências Agroveterinárias, Universidade do Estado de Santa Catarina, Lages, SC  
23 88520-000, Brazil

24 <sup>9</sup> Centro Multidisciplinar do Campus de Barra, Universidade Federal do Oeste da Bahia, Barra,  
25 BA 47100-000, Brazil

26 <sup>10</sup> Centro de Ciências Agrárias/Fitossanidade, Universidade Federal de Alagoas, Rio Largo, AL  
27 57100-000, Brazil

28 <sup>11</sup> Embrapa Arroz e Feijão, Santo Antônio de Goiás, GO 75375-000, Brazil

29 <sup>12</sup> Instituto Capixaba de Pesquisa, Assistência Técnica e Extensão Rural, CRDR-Linhares,  
30 Linhares, ES 29900-970, Brazil

31 <sup>13</sup> Lab. de Entomologia Agrícola, Faculdade de Engenharia Florestal, Universidade Federal  
32 do Pará, Altamira, PA 68372-040, Brazil

33

34 <sup>&</sup> Present address: Department of Entomology and Plant Pathology, North Carolina State  
35 University, Raleigh, NC 27695, USA

36 <sup>€</sup> Present address: Dep. de Proteção Vegetal, Universidade Estadual Paulista Júlio de Mesquita  
37 Filho, UNESP-FCA, Botucatu, SP 18610-034, Brazil

38 <sup>#</sup> Present address: School of Plant Sciences, University of Arizona, Tucson, AZ 85721, USA

39

40 \* Corresponding author: Renate Krause-Sakate

41 Phone: (+55-14) 3880-7487

42 E-mail: [renate.krause@unesp.br](mailto:renate.krause@unesp.br)

43

44 \* Corresponding author: F. Murilo Zerbini

45 Phone: (+55-31) 3612-2423

46 E-mail: [zerbini@ufv.br](mailto:zerbini@ufv.br)

47 **Abstract**

48 Plant virus ecology is strongly dependent on that of its vector. The necessity of a competent vector  
49 for transmission is a primary ecological factor driving the host range expansion of plant arthropod-  
50 borne viruses, with vectors playing an essential role in promoting disease emergence. Cassava  
51 begomoviruses severely constrain cassava production in Africa. Curiously, begomoviruses have  
52 never been reported in cassava in South America, the center of origin for this crop. It has been  
53 hypothesized that the absence of a competent begomoviruses vector that efficiently colonizes  
54 cassava is the reason why begomoviruses have not emerged in South America. To test this  
55 hypothesis, we performed a country-wide whitefly diversity study in cassava in Brazil. Adults  
56 and/or nymphs of whiteflies were collected from sixty-six cassava fields across twelve states  
57 representing the main agroecological zones of the country. A total of 1,385 individuals were  
58 genotyped based on partial mitochondrial cytochrome oxidase I (mtCOI) sequences. A high  
59 species richness was observed, with five previously described species and two putative new ones.  
60 The most prevalent species were *Tetraleurodes acaciae* and *Bemisia tuberculata*, representing  
61 over 75% of the analyzed individuals. Although we detected, for the first time, the presence of  
62 *Bemisia tabaci* Middle East-Asia Minor 1 (*Bt*MEAM1) colonizing cassava in Brazil, it was not  
63 prevalent. The species composition varied across regions, with fields in the Northeast region  
64 showing a higher diversity. These results expand our knowledge of whitefly diversity in cassava  
65 and support the hypothesis that begomovirus epidemics have not occurred in cassava in Brazil due  
66 to the absence of competent vector populations. However, they indicate an ongoing adaptation  
67 process of *Bt*MEAM1 to cassava, increasing the likelihood of begomovirus emergence in this crop  
68 in the near future.

69 **Keywords:** whitefly diversity, cassava, *Bemisia tabaci* complex, *Tetraleurodes acaciae*, *Bemisia*  
70 *tuberculata*, begomovirus

71 **Introduction**

72 Cassava (*Manihot esculenta* Crantz) is a perennial shrub of the Euphorbiaceae family with  
73 great economic and social importance, especially in Africa, Asia, and Latin America. Currently,  
74 cassava is the third most important source of calories after rice and corn and is a staple food for  
75 more than one billion of people living mainly in developing countries (1). Although the botanical  
76 and geographical origin of *M. esculenta* is still debated, studies based on genetic markers and  
77 archaeological evidence suggest that domesticated cassava originated from the wild relative  
78 progenitor *M. esculenta* ssp. *flabellifolia* in the Amazon basin, with the domestication center  
79 located at the southern border of the Amazon in Brazil (2-5). After its introduction in west Africa  
80 by Portuguese traders during the 16<sup>th</sup> century, cassava quickly disseminated throughout tropical  
81 Africa and Asia (6). Currently, the African continent is the world's biggest cassava producer,  
82 followed by Asia and South America (FAO, 2017). Due to its high resilience to adverse  
83 environmental conditions, especially drought, high yield per unit of land and low level of  
84 management and inputs required during its life cycle, cassava is a suitable crop for poor and small  
85 farmers, partially ensuring food security in many African countries (7-9).

86 Nevertheless, cassava may be affected by several pathogens and pests. Whiteflies  
87 (Hemiptera: Aleyrodidae) are one of the major constraints to its production in developing countries  
88 (10). Whiteflies comprise a diverse group of phloem-feeding insects, with more than 1,500 species  
89 assigned to 126 genera of which over 20 species have been reported to colonize cassava worldwide  
90 (11). In addition to the direct damage due feeding in the plant phloem, whiteflies cause indirect  
91 damage by deposition of honeydew, favoring the growth of sooty mold fungi on the leaf surface,  
92 and mainly by transmission of a broad range of viruses (12). Currently, species included in the  
93 genera *Aleurodicus*, *Aleurothrixus*, *Bemisia* and *Trialeurodes* have been shown to constitute

94 effective vectors of plant viruses classified in five families (12-15). *Aleurodicus dispersus* and  
95 *Aleurothrixus trachoides* each transmit only one virus from the genera *Ipomovirus* and  
96 *Begomovirus*, respectively, while *Trialeurodes vaporariorum* and *T. abutilonea* transmit a few  
97 viruses included in the genera *Crinivirus* and *Torradovirus*. On the other hand, the *Bemisia tabaci*  
98 complex comprises one of the most important group of plant virus vectors, transmitting over 430  
99 viruses, the majority included in the genus *Begomovirus* (12, 16) but including also viruses  
100 classified in the genera *Carlavirus*, *Crinivirus*, *Ipomovirus*, *Polerovirus* and *Torradovirus* (12, 17-  
101 20).

102 Over the last decade, advances in the use of molecular markers has led to a deep reappraisal  
103 of the taxonomic status of *B. tabaci* (21, 22). Based on molecular phylogeny of the mitochondrial  
104 cytochrome oxidase I (mtCOI) gene, it has been proposed that *B. tabaci* consists of a complex of  
105 more than 40 cryptic (morphologically indistinguishable) species (21-25). Partial or complete  
106 reproductive isolation and biological and ecological differences among distinct species within the  
107 complex support the proposed classification (18, 26-28). The global dissemination of polyphagous  
108 and invasive species, such as *B. tabaci* Middle East-Asia Minor 1 (*BtMEAM1*) and *B. tabaci*  
109 Mediterranean (*BtMED*), have caused major changes in the epidemiology of crop-infecting  
110 begomoviruses such as *Tomato yellow leaf curl virus* (TYLCV), currently present in all the main  
111 tomato producing areas of the world (29-31). In addition, the dissemination of polyphagous  
112 whiteflies has favored the transfer of indigenous begomoviruses from wild reservoir hosts to  
113 cultivated plants, as occurred in tomato crops in Brazil after the introduction of *BtMEAM1* in the  
114 mid-1990's (32, 33).

115 Specific associations between endemic populations of *B. tabaci* and indigenous  
116 begomoviruses have also led to the emergence of severe epidemic in crops (34, 35). Cassava

117 mosaic disease (CMD) is considered the most significant constraint to cassava production in Africa  
118 (36, 37). CMD is caused by viruses of the genus *Begomovirus* (family *Geminiviridae*), which are  
119 transmitted in a circulative manner by whiteflies of the *Bemisia tabaci* cryptic species complex  
120 (16). To date, nine cassava mosaic begomoviruses (CMBs) have been reported in association with  
121 CMD, seven of them in Africa and two in the Indian subcontinent (37-39). The emergence of CMD  
122 seems to have been the result of the transfer of indigenous begomoviruses from wild reservoir  
123 hosts to cassava, probably mediated by endemic populations of *B. tabaci* that have adapted to feed  
124 in cassava since its introduction from South America (34, 40). Although wild reservoir hosts and  
125 a possible ancestral progenitor of current begomoviruses causing CMD have not been found, the  
126 absence of cassava-infecting begomoviruses in the Americas supports an African origin for those  
127 viruses, and the presence of cassava-adapted *B. tabaci* species being restricted to Africa reinforces  
128 that hypothesis. The high species diversity and high level of molecular variation observed in viral  
129 populations causing CMD strongly suggests Africa as a diversification center for CMBs, with  
130 distinct CMBs recurrently emerging and evolving for a long time (41-44).

131 Even if CMD in Africa is caused by indigenous viruses, the fact that cassava in South  
132 America has not been affected by begomoviruses is puzzling (38, 45, 46). Carabali, Bellotti (47)  
133 suggested that the absence of cassava-infecting begomoviruses in the Americas would be due to  
134 lack of competent *B. tabaci* species that efficiently colonize cassava (34, 40). In Colombia, the  
135 inability of *B. tabaci* MEAM1 to colonize *M. esculenta* efficiently has been demonstrated under  
136 experimental conditions, reinforcing the above hypothesis (46). In addition, a recent study also  
137 from Colombia failed to detect any whitefly species of the *B. tabaci* complex in cassava (48).

138 Although whitefly diversity in Brazil has been surveyed extensively in recent years (49-  
139 54), no study has been carried out specifically to explore the composition of whitefly communities

140 colonizing cassava. Those studies carried out in other crops demonstrated that *B. tabaci* MEAM1  
141 is the predominant species across Brazil in crops such as common bean, cotton, pepper, tomato  
142 and soybean. Furthermore, *B. tabaci* MED, which was recently introduced in Brazil, has quickly  
143 spread and currently is present in five states from the South and Southeast regions (52-54). A  
144 small number of whitefly samples from cassava were analyzed in those studies, with *B. tuberculata*  
145 and *Tetraleurodes acaciae* prevalent and detected exclusively in cassava (51, 54). A large survey  
146 addressing whitefly diversity in cassava in its domestication center could provide clues to  
147 understand the absence of a CMD-like disease in the Americas. Moreover, this knowledge would  
148 be useful to anticipate the potential of emergence of begomoviruses in the crop and to help  
149 anticipate a management strategy.

150         Given this context, the objective of this work was to evaluate whitefly diversity in cassava  
151 across Brazil to infer about the absence of begomovirus epidemic in cassava. Our results  
152 demonstrated that the most prevalent species in cassava were *T. acaciae* and *B. tuberculata*. In  
153 addition, we detected for the first time the presence of *Bt*MEAM1 colonizing cassava in Brazil.  
154 The possible implications of these findings are discussed considering the absence of CMD and the  
155 potential for its emergence in cassava fields in Brazil.

156

## 157 **Methods**

### 158 **Whitefly and cassava samples**

159         Whiteflies were collected exclusively from cassava (*M. esculenta*) plants across 12  
160 Brazilian states representative of the five macroregions (North, Northeast, Midwest, Southeast and  
161 South; Figure 1) between March 2016 and February 2019 (Table 1). To gather evidence of whether  
162 a given species was colonizing cassava, adults and nymphs from the same field were collected



163 whenever possible (Table 1). Samples were obtained from commercial and non-commercial  
164 (subsistence) crops. Whitefly adults were sampled using a hand-held aspirator and nymphs were  
165 collected with the aid of a needle. Insects were preserved in 95% ethanol and stored at  $-20^{\circ}\text{C}$   
166 until being used for molecular identification of the species.

167 To verify the presence of begomoviruses infecting cassava, foliar samples were also  
168 collected at some sampled sites (Suppl. Table S1). The samples were collected randomly  
169 regardless of the presence of virus-like symptoms. The leaves were press-dried and stored at  
170 room temperature as herbarium-like samples until being used for DNA extraction.

171

## 172 **Whitefly species identification**

173 Whitefly species were identified using PCR-RFLP of the partial mtCOI fragment followed  
174 by sequencing, as previously described (54). When enough adults and nymphs were collected at a  
175 given sampled site, ten individuals from each stage were analyzed, and when only one stage was  
176 obtained, 20 individuals were tested (Table 1). When variation in the RFLP pattern was observed  
177 in the first screening, suggesting that more than one species could be present in that site,  
178 approximately five additional individuals for each stage were analyzed according to sample  
179 availability.

180 Total DNA was extracted from single individual whiteflies following a Chelex protocol  
181 (55). Briefly, adults or nymphs were ground in 30  $\mu\text{l}$  of Chelex buffer (5% Chelex in 1x Tris-  
182 EDTA) using a toothpick in a 600  $\mu\text{l}$  tube. Samples were vortexed for 30 seconds and incubated  
183 at  $99^{\circ}\text{C}$  for 8 min in a PTC-100 thermocycler (MJ Research). Next, the tubes were centrifuged at  
184 14,000 g for 5 min and 20  $\mu\text{l}$  of the supernatant was collected and transferred to a new tube. One  
185 microliter of the supernatant was used as a template for PCR amplification of a 800 bp fragment

186 of the mtCOI gene using primers C1-J-2195 and L2-N-3014 (56, 57). PCR was performed using  
187 0.2  $\mu$ M of forward and reverse primers in a final volume of 25  $\mu$ l using GoTaq Colorless Master  
188 Mix (Promega), following the manufacturer's instructions. The PCR cycles consisted of an initial  
189 denaturing step at 95°C for 5 min, followed by 35 cycles at 95°C for 30 sec, 42°C for 45 sec and  
190 72°C for 1 min, with a final extension at 72°C for 10 min. Amplified products were visualized in  
191 0.8% agarose gels stained with ethidium bromide and directly used for RFLP analysis (58).

192 RFLP analysis of the amplicons consisted of 5  $\mu$ l of each PCR product digested with 0.1  
193 unit of *TaqI* (Promega) in a final volume of 20  $\mu$ l. Reactions were performed at 65°C for 2 hours  
194 and visualized in 1.2% agarose gels stained with ethidium bromide. To verify whether the  
195 predicted mtCOI restriction pattern corresponded to a given species according to *in silico*  
196 prediction, a subset of PCR products from adults and nymphs representative of distinct patterns  
197 from different sampled sites were selected and sequenced. PCR products were precipitated with  
198 100% ethanol and 3 M sodium acetate pH 5.2 (59) and sequenced commercially (Macrogen Inc.)  
199 in both directions using primers C1-J-2195/L2-N-3014.

200 For a small subset of samples that failed to yield a PCR product using primers C1-J-2195  
201 and L2-N-3014, a second screening, using a recently described primer set with improved  
202 specificity for species of the *B. tabaci* complex and *B. afer* (2195Bt and C012/Bt-sh2), was  
203 performed (24). Samples that still failed to amplify or had unexpected RFLP pattern were  
204 analyzed with specific primers for *T. vaporariorum* (TvapF and Wfrev) (60).

205

## 206 **Sequence comparisons and phylogenetic analysis**

207 Nucleotide sequences were first checked for quality and assembled using Geneious v. 8.1  
208 (61). mtCOI sequences were initially analyzed with the BLAST*n* algorithm (62) to determine the

209 whitefly species with which they shared greatest similarity. Pairwise comparisons between all  
210 mtCOI sequences obtained here and those with higher similarities (as determined by the BLAST $n$   
211 search) were performed with the program SDT v. 1.2 (63) using the MUSCLE alignment option  
212 (64).

213 For phylogenetic analyses, the final dataset was composed of 142 sequences: 95 obtained  
214 in this work and 47 sequences representative of species in the family Aleyrodidae. Sequences were  
215 retrieved from GenBank and from the updated mtCOI reference dataset for species of the *Bemisia*  
216 *tabaci* complex (65). Multiple sequence alignments were prepared using the MUSCLE option in  
217 MEGA7 (66). Alignments were checked and manually adjusted when necessary. Phylogenetic  
218 trees were constructed using Bayesian inference performed with MrBayes v. 3.0b4 (67). The  
219 program MrModeltest v. 2.2 (68) was used to select the nucleotide substitution model with the best  
220 fit in the Akaike Information Criterion (AIC). The analyses were carried out running 50,000,000  
221 generations with sampling at every 1,000 generations and a burn-in of 25%. The convergence was  
222 assumed when average standard deviation of split frequencies was lower than 0.001. Trees were  
223 visualized and edited using FigTree ([tree.bio.ed.ac.uk/software/figtree](http://tree.bio.ed.ac.uk/software/figtree)) and CoreIDRAW X5,  
224 respectively.

225

## 226 **Virus detection in foliar samples**

227 Total DNA was extracted as described (69) and used as a template for PCR using the DNA-  
228 A universal primer pair PAL1v1978 and PAR1c496 (70). PCR was performed in a final volume  
229 of 25  $\mu$ l using *Taq* DNA Polymerase (Invitrogen) following the manufacturer's instructions. The  
230 PCR cycles consisted of an initial denaturing step at 95°C for 5 min, followed by 35 cycles at 95°C

231 for 1 min, 52°C for 1 min and 72°C for 1 min, with a final extension at 72°C for 10 min. PCR  
232 products were visualized in 0.8% agarose gels stained with ethidium bromide

233

## 234 **Diversity index and statical analysis**

235 Simpson's index of diversity (1-D) was calculated to verify if there was any difference in  
236 whitefly diversity across macroregions. This index represents the probability that two randomly  
237 chosen individuals in a given sampled site will belong to distinct species (71). Simpson's index  
238 was chosen as its value increases with increasing diversity and assigns more weight to more  
239 abundant species in a sample. We assume that species colonizing cassava will be in abundance,  
240 whereas rare species that briefly visit the plant without colonizing it will be underrepresented.  
241 Simpson's index was calculated for each sampled site separately and then pooled according to  
242 macroregions. To assess the statistical significance of the differences in diversity among regions,  
243 the non-parametric Kruskal-Wallis test followed by *post hoc* multiple comparison test using  
244 Fisher's least significant difference was calculated, using the function `kruskal` implemented in the  
245 `Agricolae` package in R software (72). Non-parametric Spearman's rank correlation coefficient  
246 analysis was performed using the `ggpubr` package in R software (72).

247

## 248 **Results**

### 249 **High whitefly species richness in cassava in Brazil**

250 To verify the composition of whitefly communities colonizing cassava in Brazil, sampling  
251 was performed across the country, including the main agroecological zones. A total of 66 sites  
252 from 12 states were sampled (Figure 1; Table 1). Out of 1,385 individuals submitted to PCR-RFLP  
253 analysis, 58 adults and 37 nymphs from different locations and representing distinct restriction

254 patterns were sequenced. The combination of PCR-RFLP followed by sequencing showed  
255 reliability and consistence for species identification without misidentification due to incongruence  
256 between the two methods.

257         Based on pairwise comparisons and molecular phylogeny of the partial mtCOI gene, we  
258 identified the presence of at least seven species comprising the whitefly community in cassava  
259 (Figure 2; Table 1). Among them, *T. acaciae* and *B. tuberculata*, both previously reported in this  
260 crop, were the most prevalent, representing over 75% of the analyzed individuals. In addition,  
261 based on the criterion of 3.5% divergence to differentiate species within the *B. tabaci* complex,  
262 three *B. tabaci* species were identified, with *BtMED* previously reported, and *BtMEAM1* and  
263 *BtNW* identified for the first time in cassava fields in Brazil (Figure 2; Table 1). The species  
264 *BtMEAM1* represented 18% of the total individuals analyzed, followed by *BtMED* (1.6%) and  
265 *BtNW* (0.21%).

266         Furthermore, two putative new species were identified (Figure 2), provisionally named  
267 whitefly new species 1 and 2 (WtNEW1 and WtNEW2). The WtNEW1 mtCOI sequence  
268 (KY249522) showed highest identity (80.65%) and clustered close to the *T. acaciae* clade,  
269 comprised of individuals reported here and three other previously reported sequences from cassava  
270 in Brazil (Figure 2). For WtNEW2, two mtCOI sequences obtained from an adult (JX678666) and  
271 a nymph (DQ989531) shared 97.81% among them and showed highest identity with *B. tabaci*  
272 (adult: 82.11%; nymph: 81.68%) and clustered as a basal sister clade to the genus *Bemisia* (Figure  
273 2). Although whitefly taxonomy is predominantly based on puparial characters (73) and there is  
274 no taxonomic criterion established based in mtCOI sequences for most of the groups, as has been  
275 proposed for the *B. tabaci* complex, the level of divergence between the two proposed new species  
276 with the closest species is similar to the level of divergence observed between species already

277 described within the Aleyrodidae, as demonstrated in pairwise comparisons (data not shown) and  
278 phylogenetic analysis (Figure 2). Nevertheless, further molecular and morphological  
279 characterization should be performed. Together, these results indicate the existence of a high  
280 whitefly species richness in cassava in Brazil.

281

### 282 **Both the prevalence and the capacity to colonize cassava differ among species**

283 Nymphs were collected for samples identified as *T. acaciae*, *B. tuberculata*, *BtMEAM1*  
284 and the two new putative species (Figure 3A), suggesting that these species may colonize cassava.  
285 Nymphs were not obtained at two sites where *BtMED* was prevalent (SP1 and SP12). Although it  
286 could be suggested that this species has the potential to colonize cassava due to the high prevalence  
287 of adults at these two sites, the lack of nymphs suggests otherwise. Moreover, at the sites PR4 and  
288 MT6, *BtMEAM1* predominated among adults but 100% of the nymphs were *B. tuberculata*,  
289 suggesting that the predominance at one stage does not necessarily mean predominance in another  
290 stage. Indeed, correlation analysis between the number of adults and nymphs, performed for all  
291 sites where both stages were sampled, showed no significant correlation between them (Supp.  
292 Figure S1). Further sampling in those sites or free-choice experiments are necessary to confirm  
293 the potential of *BtMED* to colonize cassava. Considering the whole sampling, we detected only  
294 three adults of *BtNW*, suggesting an inability of this specie to colonize cassava.

295 To verify if prevalence differs among species across distinct developmental stages, the data  
296 were separated according to stage and the proportions of individuals were compared for the three  
297 most abundant species (Figure 3B, C). Considering the entire data set, *T. acaciae* was the prevalent  
298 species, followed by *B. tuberculata* and *BtMEAM1* ( $\chi^2=152.63$ ,  $P<2.2\times 10^{-16}$ ). The same was true  
299 according to stage, either adults ( $\chi^2=28.61$ ,  $P<6.1\times 10^{-07}$ ) or nymphs ( $\chi^2=169.44$ ,  $P<2.2\times 10^{-16}$ ;

300 Figure 3B). However, caution is needed to interpret these results as only adults were sampled at  
301 some sites where *BtMEAM1* and *B. tuberculata* were prevalent (Figure 3A), which could bias the  
302 analysis, causing an underestimation of the number of nymphs for those species. Therefore, we  
303 also analyzed the data considering only those sites where both adults and nymphs were obtained.  
304 Again, *T. acaciae* was the predominant species followed by *B. tuberculata* and *BtMEAM1*  
305 considering either the entire data set ( $\chi^2=258.61$ ,  $P<2.2\times 10^{-16}$ ) or only nymphs ( $\chi^2=164.47$ ,  
306  $P<2.2\times 10^{-16}$ ). When only adults were considered, *T. acaciae* was still predominant ( $\chi^2=113.52$ ,  
307  $P<2.2\times 10^{-16}$ ) but no difference between *B. tuberculata* and *BtMEAM1* was observed ( $\chi^2=0.505$ ,  
308  $P=0.477$ ; Figure 3C). Moreover, it could be argued that samples from Minas Gerais (MG) were  
309 overrepresented in our sampling (Figure 1C), which could also bias the results presented above  
310 due to the predominance of *T. acaciae* in this state (Figure 3A). To test this possibility, we analyzed  
311 the data excluding the samples from MG. In this case, when both stages were considered, *B.*  
312 *tuberculata* was predominant ( $\chi^2=62.09$ ,  $P=3.3\times 10^{-14}$ ) but no difference between *T. acaciae* and  
313 *BtMEAM1* was observed ( $\chi^2=1.91$ ,  $P=0.166$ ). When each stage was considered separately, *B.*  
314 *tuberculata* was predominant followed by *BtMEAM1* and *T. acaciae* (adults:  $\chi^2=43.94$ ,  
315  $P=2.9\times 10^{-10}$ ; nymphs:  $\chi^2=84.19$ ,  $P<2.2\times 10^{-16}$ ). Together, these results indicate that the potential  
316 to colonize cassava differs among species, which could be due either to lower preference for the  
317 plant or to differences in the competitive ability among species during cassava colonization. In  
318 addition, they reinforce the low efficiency of *BtMEAM1* to colonize cassava.

319

### 320 **Competitive interference does not explain the differences in prevalence**

321 Interestingly, at least two species were detected co-occurring at 51% of the sampled sites  
322 (Figure 3A). To verify the possibility of competition among *T. acaciae*, *B. tuberculata* and

323 *BtMEAM1* to explain the observed differences in prevalence (instead of differences in host  
324 preference), the competitive capacity of these three species was inferred based on the analysis of  
325 predominance at the sites where they occurred together. Initially, we verified if there were any  
326 differences in incidence, defined here as the number of sampled sites where at least one individual  
327 belonging to one of the three species was detected (Figure 4A). The results demonstrate that there  
328 were no differences in incidence among them ( $\chi^2=1.25$ ,  $P=0.537$ ; Figure 4A). In addition, no  
329 differences were observed when the proportion of sites where whitefly species occurred alone or  
330 in different combinations was compared ( $\chi^2_6=3.26$ ,  $P=0.776$ ; Figure 4B). However, when we  
331 compared the occurrence between *BtMEAM1* and non-*B. tabaci* species at the sites where they  
332 occur alone, the number of sites with non-*B. tabaci* species was higher ( $\chi^2_1=6.53$ ,  $P=0.011$ ; Figure  
333 4B). Thus, the competitive capacity was inferred based on the proportion of individuals from each  
334 species at the fields where these species were detected co-occurring in different combinations  
335 (Figure 4C). Interestingly, at the sites where *BtMEAM1* and *B. tuberculata* were sampled together,  
336 *B. tuberculata* predominated over *BtMEAM1*, suggesting higher competitive potential (Figure  
337 4C). For all other species combinations, no evidence of differences in competitive capacity were  
338 observed (Figure 4C). Together, these results suggest that, rather than competition, lower host  
339 preference by *BtMEAM1* explains its non-prevalence compared to *T. acaciae* and *B. tuberculata*,  
340 resulting in low colonization rate as indicated by the low number of *BtMEAM1* nymphs detected  
341 in cassava (Figure 3).

342

### 343 **Composition and species diversity of whiteflies differ among Brazilian regions**

344 The predominance of species composing the whitefly community across macroregions  
345 varied considerably. While *T. acaciae* predominated in the North, Southeast and Northeast, it was



346 not detected in the Midwest (Figure 5A). In addition, *B. tuberculata* was detected in all regions,  
347 and was prevalent in the South and Midwest. *BtMEAM1*, although not prevalent in any of the  
348 regions, was also detected in all regions. Although the number of species detected was higher in  
349 the Southeast, where six species out seven were detected, whitefly diversity was significantly  
350 higher in fields in the Northeast according to Simpson's index of diversity (Figure 5B), with no  
351 differences among the other four regions.

352

353 **No begomoviruses detected infecting cassava**

354 To verify the presence of begomoviruses infecting cassava, we analyzed leaves sampled in  
355 some of the fields where whiteflies were collected (Supp. Table S1). Based on PCR detection using  
356 universal primers for begomoviruses, all plants were negative.

357

358 **Discussion**

359 Vectors play an essential role during the life cycle of plant viruses, directly affecting their  
360 ecology and evolution (74-76). Usually, a group of plant viruses establishes a very specific  
361 interaction with only one or a few related species of vectors, making virus ecology strongly  
362 dependent on that of its vector (74). It has been suggested that the natural host range of a virus is  
363 dependent on its vector's host range, as most plant viruses have greater specificity for the vector  
364 than for the plant host (77, 78). Indeed, the existence of a competent vector for transmission and  
365 able to colonize potential reservoir and recipient new hosts is a primary ecological factor driving  
366 host range expansion of viruses. Thus, vectors play an essential role during viral disease emergence  
367 and epidemics (12, 18, 77, 79). Understanding ecological factors, such as vector species dynamics

368 in crops, might provide important clues about historical and current events of emergence or re-  
369 emergence of viral diseases, and even anticipate the potential for new ones to occur (80).

370 Although it could be suggested that there are no begomoviruses capable of infecting  
371 cassava in the Americas, the high diversity of begomoviruses reported in a broad range of  
372 cultivated and non-cultivated plants in several botanical families, including the Euphorbiaceae,  
373 make this highly unlikely (33, 81-89). Thus, the absence of a competent vector able to colonize  
374 cassava and transfer begomoviruses from wild plants to cassava, as previously suggested (47),  
375 seems to be a more plausible hypothesis to explain the lack of begomovirus epidemics in this crop.

376 Our country-wide survey of whiteflies associated with cassava in Brazil uncovered a high  
377 degree of species diversity and showed that *T. acaciae* and *B. tuberculata* are the prevalent species  
378 across the country. Non-*B. tabaci* species, including *B. tuberculata*, have been shown to be  
379 prevalent also in Colombia (48). In contrast, in Africa, endemic species of the *B. tabaci* complex  
380 are prevalent in cassava (80, 90, 91). Previous studies surveying whitefly diversity in South  
381 American countries failed to detect *T. acaciae* and *B. tuberculata* in crops other than cassava,  
382 indicating a very narrow host range, which may in fact be restricted to cassava or at least to  
383 cultivated plants (51, 54, 92).

384 *BtMEAM1* and *BtNW* are reported here for the first time in cassava in Brazil. *BtMEAM1*  
385 was the third most prevalent species, representing 18% of the genotyped individuals, and with  
386 similar incidence to *T. acaciae* and *B. tuberculata*. The failure of previous studies to detect  
387 *BtMEAM1* in cassava may have been due to the small number of samples analyzed. The wide  
388 distribution and prevalence of *BtMEAM1* in the main agroecological zones in Brazil has been well  
389 established, mostly in association with annual crops such as soybean, cotton, common bean and  
390 tomato (54). In these crops, *BtMEAM1* has a great reproductive capacity, rapidly increasing its

391 population. Interestingly, our data showed the higher prevalence of *BtMEAM1* to be in the  
392 Midwest, where extensive agriculture predominates. The harvest of annual crops in the Midwest  
393 might cause the migration of the insect to semiperennial hosts such as cassava, which could explain  
394 why in some sites where *BtMEAM1* predominated among adults, it was not detected as nymphs  
395 (e.g., sites MT5, MT6, PR4).

396         It will be important to monitor *BtMEAM1* populations in cassava over the next years, to  
397 assess its possible adaptation to this host. The fact that we collected *BtMEAM1* nymphs at several  
398 locations suggests that this process may already be under way. We also detected *BtMED*, a  
399 worrying result given the recent introduction of this species in the Brazil and its potential to  
400 displace other species, including *BtMEAM1* (93-95). *BtMED* has disseminated quickly in the  
401 country, mainly in association with ornamental plants in greenhouses (54). Even though we detect  
402 *BtMED* associated to cassava, we cannot infer its potential to effectively colonize this host since  
403 only adults were collected. The third species detected is the indigenous *BtNW*. Although  
404 *BtMEAM1* partially displaced *BtNW* in Brazil, this species can still be sporadically detected,  
405 mostly in association with non-cultivated hosts (50, 51, 54). It has been recurrently detected in  
406 *Euphorbia heterophylla*, suggesting a potential to colonize other species in the family  
407 Euphorbiaceae. However, the very low frequency with which it was detected and the absence of  
408 nymphs indicate that *BtNW* is poorly adapted to cassava.

409         The identification of two putative new species highlights the remarkable genetic diversity  
410 of whiteflies. Interestingly, one of the new species was collected in the state of Mato Grosso, which  
411 corresponds to the region considered to be the domestication center of cassava (2-5). Further  
412 studies are needed to explore plant biodiversity in this region (96, 97), which might reveal a similar  
413 diversity of whiteflies which may be specifically adapted to non-cultivated plant species due to

414 long term co-evolution. The close phylogenetic relationship of the new species with non-*B. tabaci*  
415 whiteflies suggests that they are not virus vectors.

416 Whitefly species richness in cassava is just starting to be assessed, and may be greater than  
417 reported here. Based on morphological characters, Alonso, Racca-Filho (98) reported the presence  
418 of *Aleurothrixus aepim* and *Trialeurodes manihoti* colonizing cassava in the state of Rio de  
419 Janeiro. Although we did not analyze samples from that region, the failure to detect these species  
420 in other states suggests a restricted occurrence. Moreover, morphological characters alone are not  
421 always sufficient to classify whiteflies at the species level, and additional studies using molecular  
422 tools are needed to assess these molecularly uncharacterized whiteflies species (99).

423 Host suitability has been shown to be an important factor influencing the competitive  
424 capacity among species of the *B. tabaci* complex (94, 95, 100). Watanabe, Bello (95 ) demonstrated  
425 that displacement capacity between two invasive *B. tabaci* species was dependent on host  
426 suitability. While *BtMEAM1* displaced *BtMED* only on tomato, *BtMED* displaced *BtMEAM1* on  
427 sweet pepper and common bean. Luan, Xu (100) demonstrated that even in a host plant poorly  
428 suitable for *BtMEAM1*, it was able to displace an indigenous species challenger. These authors  
429 demonstrated that even though host suitability may affect the speed of displacement, it may not  
430 affect the direction, as *BtMEAM1* always won the challenge (100). Interestingly, two or more  
431 species occurring sympatrically were detected in 51% of the fields analyzed in our study. In sites  
432 where *BtMEAM1* and *B. tuberculata* co-occurred, *B. tuberculata* predominated, suggesting a  
433 higher competitive capacity. Nonetheless, in all other combinations of co-occurring species, no  
434 differences in prevalence were observed. Thus, competitive capacity is unlikely to explain the low  
435 prevalence of *BtMEAM1*, or the differences observed between *T. acaciae* and *B. tuberculata*.

436 Host adaptation may be a more important component affecting the low predominance of  
437 *BtMEAM1* in cassava, as previously suggested (47). The inability of *BtMEAM1* and *BtMED* to  
438 colonize domesticated cassava efficiently has been demonstrated under experimental conditions  
439 (45, 46, 102, 103). Carabali, Montoya-Lerma (45), evaluating the colonization potential of  
440 *BtMEAM1* in three commercial cassava genotypes, demonstrated that only in one of them did  
441 *BtMEAM1* complete its development cycle from eggs to adult, and even then, at very low rates  
442 (0.003%). Using an electrical penetration graph assay, Milenovic, Wosula (103) demonstrated the  
443 inability of *BtMED* to feed in cassava plants. Adults of this species spent a very short time  
444 ingesting cassava phloem sap compared to sap from a suitable host, suggesting that they would die  
445 by starvation in the field. Furthermore, the low efficiency of whiteflies of the *BtMED*  
446 mitochondrial subgroups Q1 and Q2 in using cassava as a host has also been demonstrated (102).  
447 Oviposition and adult survival rates were very low, and development from eggs to adults was not  
448 observed. Although these studies were conducted under experimental conditions, the low  
449 predominance of *BtMEAM1* and *BtMED* shown here and in other field surveys in Africa (90, 91,  
450 101) strongly indicates a low adaptation of these species to cassava.

451 Nevertheless, our results indicate an ongoing adaptation process of *BtMEAM1* to cassava,  
452 with the detection of nymphs and adults in the same field. Interestingly, Carabali, Bellotti (47)  
453 demonstrated a gradual increase in the rate of reproduction and development of *BtMEAM1* after  
454 successive passages on plants phylogenetically related to the genus *Manihot* (*Euphorbia*  
455 *pulcherrima* and *Jatropha gossypifolia*), indicating the potential of this whitefly species to  
456 become adapted to cassava through intermediate hosts. Furthermore, successful reproduction in  
457 the wild relative *M. esculenta* ssp. *flabellifolia* indicates that this plant may constitute an  
458 intermediate host leading to adaptation (46). This plant has been reported to be widely spread in

459 the Amazon basin and the Midwest region of Brazil (97). Interestingly, our data showed the higher  
460 prevalence of *BtMEAM1* to be in the Midwest. Although we cannot establish a cause and effect  
461 relationship, it is reasonable to speculate that *M. esculenta* ssp. *flabellifolia* could be acting as an  
462 intermediate host mediating adaptation. A survey addressing whitefly diversity in this host should  
463 be necessary to test this hypothesis.

464 In Brazil, cassava is predominantly grown as a subsistence crop, usually side by side with  
465 other vegetables and with a high incidence of weeds. Growing cassava in a heterogenous  
466 environment, especially in the presence of related plants, may increase the adaptation potential of  
467 *BtMEAM1* and other species of the complex such as *BtMED*, which we also detected in the open  
468 field. A high diversity of plants in cassava fields may allow an overlapping of ecological niches  
469 for distinct whitefly species, which under enough selection pressure may gradually adapt to new  
470 hosts. The sympatric occurrence of *T. acaciae*, *B. tuberculata* and *BtMEAM1*, supports the role of  
471 botanical heterogeneity in shaping the composition of whitefly populations associated with  
472 cassava. A similar pattern was observed in Colombia, with 66% of the surveyed sites showing at  
473 least two species occurring sympatrically (48). Moreover, a predominance of one species in a given  
474 developmental stage and a different one in another stage (e.g., nymphs vs adults) at the same site  
475 suggests that other hosts may sustain reproduction and development, with adults migrating to  
476 cassava.

477 *Euphorbia heterophylla* (family Euphorbiaceae) is an invasive weed widely spread across  
478 Brazil and associated with several crops (89, 104). The presence of *E. heterophylla* plants in  
479 association with cassava (Figure 1A) and the fact that it was the most suitable host for *BtMEAM1*  
480 in Brazil out seven tested (105) shows its potential to act as an intermediate host mediating  
481 *BtMEAM1* adaptation. *E. heterophylla* has been frequently associated with the begomovirus

482 *Euphorbia yellow mosaic virus* (EuYMV) (89). Barreto, Hallwass (106) demonstrated that this  
483 plant is also a host of *Tomato severe rugose virus* (ToSRV), which even at a very low titer was  
484 transmitted to tomato plants, demonstrating the potential of *E. heterophylla* to act as a reservoir  
485 host. Surprisingly, considering that *E. heterophylla* and tomato belong to distinct botanical  
486 families, EuYMV is able to infect tomato (106). The closer botanical relationship between *E.*  
487 *heterophylla* and cassava may indicate a higher potential of EuYMV to infect cassava. The  
488 presence of EuYMV-infected *E. heterophylla* in cassava fields, as observed in this study (Figure  
489 1A), its suitability as a host for *BtMEAM1*, and the high efficiency of EuYMV transmission by  
490 *BtMEAM1* (107), suggest that EuYMV may have spillover potential to cassava. Experiments are  
491 ongoing in our laboratory to assess this spillover potential.

492         The emergence of begomoviruses in tomato crops in Brazil followed the introduction of  
493 *BtMEAM1* (32, 33), demonstrating the role of vector populations in promoting viral host range  
494 expansion and consequently epidemics. Thus, the adaptation of whiteflies to cassava could  
495 facilitate the emergence of begomoviruses in this crop. The establishment of management  
496 strategies to prevent or at least delaying the adaptation process is therefore necessary. *Bemisia*  
497 *tabaci* species may disperse across long distances international trade routes (108). Thus,  
498 preventing the introduction of cassava-adapted *B. tabaci* species from Africa should also be a  
499 priority.

500

#### 501 **Data accessibility**

502 mtCOI sequences obtained in this study were deposited in GenBank under accession numbers:  
503 MT901081 to MT901172 and MT904381 to MT904382. For detailed information see  
504 Supplementary Table S2.

505

## 506 **Competing interests**

507 The authors declare that they have no competing interests

508

## 509 **Author's contribution**

510 CADX, FMZ and RKS contributed to the design and implementation of the study; CADX, AMN,  
511 VHB, LFMW, MAJ, LFB, JEABJ, AJB, RFC, ESG, JHJ, GK, GSAL, CAL, RNM, KFCP, FNS,  
512 RRS, ENS and JWPS collected whitefly and leaf samples; CADX, AMN, VHB and LFMW  
513 processed whitefly samples; CADX performed the analyses and drafted the manuscript; CADX  
514 and FMZ prepared the final version of the manuscript.

515

## 516 **Acknowledgements**

517 This work was funded by CAPES (Financial code 01), CNPq (409599/2016-6) and Fapemig  
518 (APQ-03276-18) grants to FMZ.

519

## 520 **References**

- 521 1. Montagnac JA, Davis CR, Tanumihardjo SA. Nutritional value of cassava for use as a  
522 staple food and recent advances for improvement. *Comprehensive Reviews in Food*  
523 *Science and Food Safety*. 2009;8(3):181-94.
- 524 2. Olsen KM, Schaal BA. Evidence on the origin of cassava: phylogeography of *Manihot*  
525 *esculenta*. *Proceedings of the National Academy of Sciences, USA*. 1999;96(10):5586-91.
- 526 3. Leotard G, Duputie A, Kjellberg F, Douzery EJ, Debain C, de Granville JJ, et al.  
527 Phylogeography and the origin of cassava: new insights from the northern rim of the  
528 Amazonian basin. *Molecular Phylogenetics and Evolution*. 2009;53(1):329-34.
- 529 4. Clement CR, Rodrigues DP, Alves-Pereira A, Mühlen GS, Cristo-Araújo Md, Moreira PA,  
530 et al. Crop domestication in the upper Madeira River basin. *Boletim do Museu Paraense*  
531 *Emílio Goeldi Ciências Humanas*. 2016;11:193-205.



- 532 5. Watling J, Shock MP, Mongeló GZ, Almeida FO, Kater T, De Oliveira PE, et al. Direct  
533 archaeological evidence for Southwestern Amazonia as an early plant domestication and  
534 food production centre. *PloS one*. 2018;13(7):e0199868.
- 535 6. Carter SE, Fresco LO, Jones PG, Fairbairn JN. Introduction and diffusion of cassava in  
536 Africa. IITA Research Guide no. 49. Ibadan, Nigeria: International Institute of Tropical  
537 Agriculture (IITA); 1997. 34 p.
- 538 7. Alves AAC, Setter TL. Response of cassava leaf area expansion to water deficit: cell  
539 proliferation, cell expansion and delayed development. *Annals of Botany*. 2004;94(4):605-  
540 13. Epub 2004/08/19.
- 541 8. El-Sharkawy MA. Cassava biology and physiology. *Plant Molecular Biology*.  
542 2004;56(4):481-501.
- 543 9. Gleadow R, Pegg A, Blomstedt CK. Resilience of cassava (*Manihot esculenta* Crantz) to  
544 salinity: implications for food security in low-lying regions. *Journal of Experimental*  
545 *Botany*. 2016;67(18):5403-13. Epub 2016/08/09.
- 546 10. Herrera Campo BV, Hyman G, Bellotti A. Threats to cassava production: known and  
547 potential geographic distribution of four key biotic constraints. *Food Security*.  
548 2011;3(3):329.
- 549 11. Vasquez-Ordonez AA, Hazzi NA, Escobar-Prieto D, Paz-Jojoa D, Parsa S. A geographic  
550 distribution database of the Neotropical cassava whitefly complex (Hemiptera,  
551 Aleyrodidae) and their associated parasitoids and hyperparasitoids (Hymenoptera).  
552 *Zookeys*. 2015(545):75-87. Epub 2016/01/23.
- 553 12. Navas-Castillo J, Fiallo-Olivé E, Sánchez-Campos S. Emerging virus diseases transmitted  
554 by whiteflies. *Annual Review of Phytopathology* 2011;49:219-48.
- 555 13. Njoroge MK, Mutisya DL, Miano DW, Kilalo DC. Whitefly species efficiency in  
556 transmitting cassava mosaic and brown streak virus diseases. *Cogent Biology*.  
557 2017;3(1):1311499.
- 558 14. Maruthi MN, Jeremiah SC, Mohammed IU, Legg JP. The role of the whitefly, *Bemisia*  
559 *tabaci* (Gennadius), and farmer practices in the spread of cassava brown streak  
560 ipomoviruses. *Journal of Phytopathology*. 2017;165(11-12):707-17. Epub 2017/08/22.
- 561 15. Chandrashekar K, Rao A, Gorane A, Verma R, Tripathi S. *Aleurothrixus trachoides* (Back)  
562 can transmit begomovirus from *Duranta* to potato, tomato and bell pepper. *J Biosci*.  
563 2020;45:36.
- 564 16. Zerbini FM, Briddon RW, Idris A, Martin DP, Moriones E, Navas-Castillo J, et al. ICTV  
565 Virus Taxonomy Profile: *Geminiviridae*. *Journal of General Virology*. 2017;98(2):131-3.
- 566 17. Whitfield AE, Falk BW, Rotenberg D. Insect vector-mediated transmission of plant  
567 viruses. *Virology*. 2015;480:278-89.

- 568 18. Gilbertson RL, Batuman O, Webster CG, Adkins S. Role of the insect supervectors *Bemisia*  
569 *tabaci* and *Frankliniella occidentalis* in the emergence and global spread of plant viruses.  
570 Annual Review of Virology. 2015;2:67-93.
- 571 19. Ghosh S, Kanakala S, Lebedev G, Kontsedalov S, Silverman D, Alon T, et al. Transmission  
572 of a new polerovirus infecting pepper by the whitefly *Bemisia tabaci*. Journal of virology.  
573 2019;15:00488-19.
- 574 20. Costa TM, Inoue-Nagata AK, Vidal AH, Ribeiro SdG, Nagata T. The recombinant isolate  
575 of cucurbit aphid-borne yellows virus from Brazil is a polerovirus transmitted by  
576 whiteflies. Plant Pathology. 2020;69(6):1042-50.
- 577 21. Dinsdale A, Cook L, Riginos C, Buckley YM, De Barro P. Refined global analysis of  
578 *Bemisia tabaci* (Hemiptera: Sternorrhyncha: Aleyrodoidea: Aleyrodidae) mitochondrial  
579 cytochrome oxidase 1 to identify species level genetic boundaries. Annals of the  
580 Entomological Society of America. 2010;103(2):196-208.
- 581 22. De Barro PJ, Liu SS, Boykin LM, Dinsdale AB. *Bemisia tabaci*: A statement of species  
582 status. Annual Review of Entomology. 2011;56:1-19.
- 583 23. Lee W, Park J, Lee GS, Lee S, Akimoto SI. Taxonomic status of the *Bemisia tabaci*  
584 complex (Hemiptera: Aleyrodidae) and reassessment of the number of its constituent  
585 species. PloS one. 2013;8:e63817.
- 586 24. Mugerwa H, Seal S, Wang H-L, Patel MV, Kabaalu R, Omongo CA, et al. African ancestry  
587 of New World, *Bemisia tabaci*-whitefly species. Scientific reports. 2018;8(1):2734.
- 588 25. Vyskočilová S, Tay WT, van Brunschot S, Seal S, Colvin J. An integrative approach to  
589 discovering cryptic species within the *Bemisia tabaci* whitefly species complex. Scientific  
590 reports. 2018;8(1):10886.
- 591 26. Qin L, Pan L-L, Liu S-S. Further insight into reproductive incompatibility between putative  
592 cryptic species of the *Bemisia tabaci* whitefly complex. Insect Science. 2016;23(2):215-  
593 24.
- 594 27. De Marchi BR, Marubayashi JM, Favara GM, Yuki VA, Watanabe LFM, Barbosa LF, et  
595 al. Comparative transmission of five viruses by *Bemisia tabaci* NW2 and MEAM1.  
596 Tropical Plant Pathology. 2017;42(6):495-9.
- 597 28. Malka O, Santos-Garcia D, Feldmesser E, Sharon E, Krause-Sakate R, Delatte H, et al.  
598 Species-complex diversification and host-plant associations in *Bemisia tabaci*: A plant-  
599 defence, detoxification perspective revealed by RNA-Seq analyses. Molecular Ecology.  
600 2018;27(21):4241-56.
- 601 29. Lefeuvre P, Martin DP, Harkins G, Lemey P, Gray AJA, Meredith S, et al. The spread of  
602 tomato yellow leaf curl virus from the Middle East to the world. PLoS Pathogens.  
603 2010;6(10):e1001164.

- 604 30. Mabvakure B, Martin DP, Kraberger S, Cloete L, van Brunshot S, Geering AD, et al.  
605 Ongoing geographical spread of *Tomato yellow leaf curl virus*. *Virology*. 2016;498:257-  
606 64.
- 607 31. Pan H, Chu D, Yan W, Su Q, Liu B, Wang S, et al. Rapid spread of tomato yellow leaf curl  
608 virus in China is aided differentially by two invasive whiteflies. *PloS one*.  
609 2012;7(4):e34817. Epub 2012/04/20.
- 610 32. Ribeiro SG, Ávila AC, Bezerra IC, Fernandes JJ, Faria JC, Lima MF, et al. Widespread  
611 occurrence of tomato geminiviruses in Brazil, associated with the new biotype of the  
612 whitefly vector. *Plant Disease*. 1998;82:830.
- 613 33. Rocha CS, Castillo-Urquiza GP, Lima ATM, Silva FN, Xavier CAD, Hora-Junior BT, et  
614 al. Brazilian begomovirus populations are highly recombinant, rapidly evolving, and  
615 segregated based on geographical location. *Journal of virology*. 2013;87(10):5784-99.
- 616 34. Fauquet C, Fargette D. African cassava mosaic virus: etiology, epidemiology and control.  
617 *Plant Disease*. 1990;74:404-11.
- 618 35. Pan LL, Cui XY, Chen QF, Wang XW, Liu SS. Cotton leaf curl disease: which whitefly is  
619 the vector? *Phytopathology*. 2018;108(10):1172-83.
- 620 36. Rey C, Vanderschuren H. Cassava mosaic and brown streak diseases: current perspectives  
621 and beyond. *Annual Review of Virology*. 2017;4(1):429-52. Epub 2017/06/25.
- 622 37. Jacobson AL, Duffy S, Sseruwagi P. Whitefly-transmitted viruses threatening cassava  
623 production in Africa. *Current Opinion in Virology*. 2018;33:167-76. Epub 2018/09/23.
- 624 38. Patil BL, Fauquet CM. Cassava mosaic geminiviruses: actual knowledge and perspectives.  
625 *Plant Pathology*. 2009;10(5):685-701.
- 626 39. Legg JP, Lava Kumar P, Makesh Kumar T, Tripathi L, Ferguson M, Kanju E, et al. Cassava  
627 virus diseases: biology, epidemiology, and management. *Advances in Virus Research*.  
628 2015;91:85-142. Epub 2015/01/17.
- 629 40. Legg J, Fauquet C. Cassava mosaic geminiviruses in Africa. *Plant Molecular Biology*.  
630 2004;56(4):585-99.
- 631 41. De Bruyn A, Villemot J, Lefeuvre P, Villar E, Hoareau M, Harimalala M, et al. East  
632 African cassava mosaic-like viruses from Africa to Indian ocean islands: molecular  
633 diversity, evolutionary history and geographical dissemination of a bipartite begomovirus.  
634 *BMC evolutionary biology*. 2012;12:228. Epub 2012/11/29.
- 635 42. Ndunguru J, Legg J, Aveling T, Thompson G, Fauquet C. Molecular biodiversity of  
636 cassava begomoviruses in Tanzania: evolution of cassava geminiviruses in Africa and  
637 evidence for East Africa being a center of diversity of cassava geminiviruses. *Virology*  
638 *Journal*. 2005;2(1):21.

- 639 43. De Bruyn A, Harimalala M, Zinga I, Mabvakure BM, Hoareau M, Ravigne V, et al.  
640 Divergent evolutionary and epidemiological dynamics of cassava mosaic geminiviruses in  
641 Madagascar. *BMC evolutionary biology*. 2016;16:182.
- 642 44. Tiendrebeogo F, Lefeuvre P, Hoareau M, Harimalala MA, De Bruyn A, Villemot J, et al.  
643 Evolution of *African cassava mosaic virus* by recombination between bipartite and  
644 monopartite begomoviruses. *Virology*. 2012;9:67.
- 645 45. Carabali A, Montoya-Lerma J, Bellotti AC. Development and reproduction of *Bemisia*  
646 *tabaci* "B" (Hemiptera : Aleyrodidae) on cassava (*Manihot esculenta*) genotypes. *Revista*  
647 *Colombiana de Entomologia*. 2008;34(1):28-32.
- 648 46. Carabali A, Bellotti AC, Montoya-Lerma J. Biological parameters of *Bemisia tabaci*  
649 (Gennadius) biotype B (Hemiptera: Aleyrodidae) on *Jatropha gossypifolia*, commercial  
650 (*Manihot esculenta*) and wild cassava (*Manihot flabellifolia* and *M. carthagenensis*)  
651 (Euphorbiaceae). *Neotropical Entomology*. 2010;39(4):562-7.
- 652 47. Carabali A, Bellotti AC, Montoya-Lerma J, Cuellar ME. Adaptation of *Bemisia tabaci*  
653 biotype B (Gennadius) to cassava, *Manihot esculenta* (Crantz). *Crop Protection*.  
654 2005;24(7):643-9.
- 655 48. Gómez-Díaz JS, Montoya-Lerma J, Muñoz-Valencia V. Prevalence and diversity of  
656 endosymbionts in cassava whiteflies (Hemiptera: Aleyrodidae) from Colombia. *Journal of*  
657 *Insect Science*. 2019;19(3).
- 658 49. Rocha KCG, Marubayashi JM, Navas-Castillo J, Yuki VA, Wilcken CF, Pavan MA, et al.  
659 Only the B biotype of *Bemisia tabaci* is present on vegetables in Sao Paulo state, Brazil.  
660 *Scientia Agricola*. 2011;68(1):120-3.
- 661 50. Marubayashi JM, Yuki VA, Rocha KCG, Mituti T, Pelegrinotti FM, Ferreira FZ, et al. At  
662 least two indigenous species of the *Bemisia tabaci* complex are present in Brazil. *Journal*  
663 *of Applied Entomology*. 2013;137(1-2):113-21.
- 664 51. Marubayashi JM, Kliot A, Yuki VA, Rezende JA, Krause-Sakate R, Pavan MA, et al.  
665 Diversity and localization of bacterial endosymbionts from whitefly species collected in  
666 Brazil. *PloS one*. 2014;9(9):e108363.
- 667 52. Barbosa LF, Yuki VA, Marubayashi JM, De Marchi BR, Perini FL, Pavan MA, et al. First  
668 report of *Bemisia tabaci* Mediterranean (Q biotype) species in Brazil. *Pest Management*  
669 *Science*. 2015;71(4):501-4.
- 670 53. Moraes LA, Marubayashi JM, Yuki VA, Ghanim M, Bello VH, De Marchi BR, et al. New  
671 invasion of *Bemisia tabaci* Mediterranean species in Brazil associated to ornamental plants.  
672 *Phytoparasitica*. 2017;45(4):517-25.
- 673 54. Moraes LA, Muller C, Bueno R, Santos A, Bello VH, De Marchi BR, et al. Distribution  
674 and phylogenetics of whiteflies and their endosymbiont relationships after the  
675 Mediterranean species invasion in Brazil. *Scientific reports*. 2018;8(1):14589.

- 676 55. Walsh PS, Metzger DA, Higuchi R. Chelex 100 as a medium for simple extraction of DNA  
677 for PCR-based typing from forensic material. *Biotechniques*. 1991;10(4):506-13.
- 678 56. Simon C, Frati F, Beckenbach A, Crespi B, Liu H, Flook P. Evolution, weighting and  
679 phylogenetic utility of mitochondrial gene sequences and a compilation of conserved  
680 polymerase chain reaction primers. *Annals of the Entomological Society of America*.  
681 1994;87(6):651-701.
- 682 57. Frohlich DR, Torres-Jerez II, Bedford ID, Markham PG, Brown JK. A phylogeographical  
683 analysis of the *Bemisia tabaci* species complex based on mitochondrial DNA markers.  
684 *Molecular Ecology*. 1999;8(10):1683-91.
- 685 58. Bosco D, Loria A, Sartor C, Cenis JL. PCR-RFLP identification of *Bemisia tabaci* biotypes  
686 in the Mediterranean Basin. *Phytoparasitica*. 2006;34(3):243.
- 687 59. Sambrook J, Russell DW. Standard ethanol precipitation of DNA in microcentrifuge tubes.  
688 *CSH Protoc*. 2006;1(1).
- 689 60. Scott IAW, Workman PJ, Drayton GM, Burnip GM. First record of *Bemisia tabaci* biotype  
690 Q in New Zealand. *New Zealand Plant Protection*. 2007;60:264-70.
- 691 61. Kearse M, Moir R, Wilson A, Stones-Havas S, Cheung M, Sturrock S, et al. Geneious  
692 Basic: an integrated and extendable desktop software platform for the organization and  
693 analysis of sequence data. *Bioinformatics*. 2012;28(12):1647-9.
- 694 62. Altschul SF, Gish W, Miller W, Myers EW, Lipman DJ. Basic local alignment search tool.  
695 *Journal of molecular biology*. 1990;215:403-10.
- 696 63. Muhire BM, Varsani A, Martin DP. SDT: A virus classification tool based on pairwise  
697 sequence alignment and identity calculation. *PloS one*. 2014;9:e108277.
- 698 64. Edgar RC. MUSCLE: a multiple sequence alignment method with reduced time and space  
699 complexity. *BMC bioinformatics*. 2004;5:1-19.
- 700 65. Boykin LM, Savill A, De Barro P. Updated mtCOI reference dataset for the *Bemisia tabaci*  
701 species complex. *F1000Res*. 2017;6:1835. Epub 2017/11/24.
- 702 66. Kumar S, Stecher G, Tamura K. MEGA7: molecular evolutionary genetics analysis version  
703 7.0 for bigger datasets. *Molecular biology and evolution*. 2016;33(7):1870-4.
- 704 67. Ronquist F, Huelsenbeck JP. MrBayes 3: Bayesian phylogenetic inference under mixed  
705 models. *Bioinformatics*. 2003;19(1):1572-4.
- 706 68. Nylander JAA. MrModeltest v2. Program distributed by the author Evolutionary Biology  
707 Centre, Uppsala University 2004.
- 708 69. Doyle JJ, Doyle JL. A rapid DNA isolation procedure for small amounts of fresh leaf tissue.  
709 *Phytochemical Bulletin*. 1987;19:11-5.

- 710 70. Rojas MR, Gilbertson RL, Russell DR, Maxwell DP. Use of degenerate primers in the  
711 polymerase chain reaction to detect whitefly-transmitted geminiviruses. *Plant Disease*.  
712 1993;77:340-7.
- 713 71. Morris EK, Caruso T, Buscot F, Fischer M, Hancock C, Maier TS, et al. Choosing and  
714 using diversity indices: insights for ecological applications from the German Biodiversity  
715 Exploratories. *Ecology and Evolution*. 2014;4(18):3514-24. Epub 2014/08/28.
- 716 72. R Development Core Team. *R: A language and environment for statistical computing*: R  
717 Foundation for Statistical Computing, Vienna, Austria; 2007.
- 718 73. Hodges GS, Evans GA. An identification guide to the whiteflies (Hemiptera: Aleyrodidae)  
719 of the southeastern United States. *Florida Entomologist*. 2005;88(4):518-34, 17.
- 720 74. Gallet R, Michalakis Y, Blanc S. Vector-transmission of plant viruses and constraints  
721 imposed by virus-vector interactions. *Curr Opin Virol*. 2018;33:144-50. Epub 2018/09/18.
- 722 75. Sacristan S, Malpica JM, Fraile A, Garcia-Arenal F. Estimation of population bottlenecks  
723 during systemic movement of Tobacco mosaic virus in tobacco plants. *Journal of virology*.  
724 2003;77(18):9906-11.
- 725 76. Gutierrez S, Zwart MP. Population bottlenecks in multicomponent viruses: first forays into  
726 the uncharted territory of genome-formula drift. *Curr Opin Virol*. 2018;33:184-90. Epub  
727 2018/11/25.
- 728 77. Elena SF, Fraile A, Garcia-Arenal F. Evolution and emergence of plant viruses. *Advances*  
729 *in Virus Research*. 2014;88:161-91. Epub 2014/01/01.
- 730 78. Dietzgen RG, Mann KS, Johnson KN. Plant virus-insect vector interactions: current and  
731 potential future research directions. *Viruses*. 2016;8(11):303.
- 732 79. Fereres A. Insect vectors as drivers of plant virus emergence. *Current Opinion in Virology*.  
733 2015;10:42-6.
- 734 80. Legg JP, Sseruwagi P, Boniface S, Okao-Okuja G, Shirima R, Bigirimana S, et al. Spatio-  
735 temporal patterns of genetic change amongst populations of cassava *Bemisia tabaci*  
736 whiteflies driving virus pandemics in East and Central Africa. *Virus Research*.  
737 2014;186:61-75.
- 738 81. Fernandes FR, Albuquerque LC, Giordano LB, Boiteux LS, Ávila AC, Inoue-Nagata AK.  
739 Diversity and prevalence of Brazilian bipartite begomovirus species associated to  
740 tomatoes. *Virus Genes*. 2008;36:251-8.
- 741 82. Fernandes FR, Albuquerque LC, Oliveira CL, Cruz ARR, Rocha WB, Pereira TG, et al.  
742 Molecular and biological characterization of a new Brazilian begomovirus, euphorbia  
743 yellow mosaic virus (EuYMV), infecting *Euphorbia heterophylla* plants. *Archives of*  
744 *virology*. 2011;156(11):2063-9.

- 745 83. Albuquerque LC, Inoue-Nagata AK, Pinheiro B, Resende RO, Moriones E, Navas-Castillo  
746 J. Genetic diversity and recombination analysis of sweepoviruses from Brazil. *Virology*  
747 *Journal*. 2012;9:241.
- 748 84. Albuquerque LC, Varsani A, Fernandes FR, Pinheiro B, Martin DP, Ferreira PTO, et al.  
749 Further characterization of tomato-infecting begomoviruses in Brazil. *Archives of*  
750 *virology*. 2012;157(4):747-52.
- 751 85. Macedo MA, Albuquerque LC, Maliano MR, Souza JO, Rojas MR, Inoue-Nagata AK, et  
752 al. Characterization of tomato leaf curl purple vein virus, a new monopartite New World  
753 begomovirus infecting tomato in Northeast Brazil. *Archives of virology*. 2017;163:737-43.  
754 Epub 2017/12/11.
- 755 86. Castillo-Urquiza GP, Beserra Jr. JEA, Bruckner FP, Lima ATM, Varsani A, Alfenas-  
756 Zerbini P, et al. Six novel begomoviruses infecting tomato and associated weeds in  
757 Southeastern Brazil. *Archives of virology*. 2008;153:1985-9.
- 758 87. Paz-Carrasco LC, Castillo-Urquiza GP, Lima AT, Xavier CA, Vivas-Vivas LM, Mizubuti  
759 ES, et al. Begomovirus diversity in tomato crops and weeds in Ecuador and the detection  
760 of a recombinant isolate of rhynchosia golden mosaic Yucatan virus infecting tomato.  
761 *Archives of virology*. 2014;159(8):2127-32.
- 762 88. Rodríguez-Negrete EA, Morales-Aguilar JJ, Domínguez-Duran G, Torres-Devora G,  
763 Camacho-Beltrán E, Leyva-López NE, et al. High-throughput sequencing reveals  
764 differential begomovirus species diversity in non-cultivated plants in Northern-Pacific  
765 Mexico. *Viruses*. 2019;11(7):594.
- 766 89. Mar TB, Xavier CAD, Lima ATM, Nogueira AM, Silva JCF, Ramos-Sobrinho R, et al.  
767 Genetic variability and population structure of the New World begomovirus *Euphorbia*  
768 *yellow mosaic virus*. *Journal of General Virology*. 2017;98(6):1537-51. Epub 2017/06/15.
- 769 90. Ghosh S, Bouvaine S, Maruthi MN. Prevalence and genetic diversity of endosymbiotic  
770 bacteria infecting cassava whiteflies in Africa. *BMC Microbiology*. 2015;15(1):93.
- 771 91. Tocko-Marabena BK, Silla S, Simiand C, Zinga I, Legg J, Reynaud B, et al. Genetic  
772 diversity of *Bemisia tabaci* species colonizing cassava in Central African Republic  
773 characterized by analysis of cytochrome c oxidase subunit I. *PloS one*. 2017;12(8).
- 774 92. Alemandri V, Vaghi Medina CG, Dumon AD, Arguello Caro EB, Mattio MF, Garcia  
775 Medina S, et al. Three members of the *Bemisia tabaci* (Hemiptera: Aleyrodidae) cryptic  
776 species complex occur sympatrically in Argentine horticultural crops. *Journal of Economic*  
777 *Entomology*. 2015;108(2):405-13.
- 778 93. Liu BM, Yan FM, Chu D, Pan HP, Jiao XG, Xie W, et al. Difference in feeding behaviors  
779 of two invasive whiteflies on host plants with different suitability: implication for  
780 competitive displacement. *International Journal of Biological Sciences*. 2012;8(5):697-  
781 706.

- 782 94. Sun D-B, Liu Y-Q, Qin L, Xu J, Li F-F, Liu S-S. Competitive displacement between two  
783 invasive whiteflies: insecticide application and host plant effects. *Bulletin of*  
784 *Entomological Research*. 2013;103(3):344-53. Epub 2013/03/05.
- 785 95. Watanabe LFM, Bello VH, De Marchi BR, Silva FBd, Fusco LM, Sartori MM, et al.  
786 Performance and competitive displacement of *Bemisia tabaci* MEAM1 and MED cryptic  
787 species on different host plants. *Crop Protection*. 2019;124:104860.
- 788 96. Nassar N. Cassava, *Manihot esculenta* Crantz and wild relatives: their relationships and  
789 evolution. *Genetic Resources and Crop Evolution*. 2001;48(5):429-36.
- 790 97. Olsen KM. SNPs, SSRs and inferences on cassava's origin. *Plant Molecular Biology*.  
791 2004;56(4):517-26.
- 792 98. Alonso RdS, Racca-Filho F, Lima AFd. Occurrence of whiteflies (Hemiptera:  
793 Aleyrodidae) on cassava (*Manihot esculenta* Crantz) crops under field conditions in the  
794 state of Rio de Janeiro, Brazil. *EntomoBrasilis*. 2012;5(1):2. Epub 2012-04-02.
- 795 99. Dickey AM, Stocks IC, Smith T, Osborne L, McKenzie CL. DNA Barcode development  
796 for three recent exotic whitefly (Hemiptera: Aleyrodidae) invaders in Florida. *Florida*  
797 *Entomologist*. 2015;98(2):473-8, 6.
- 798 100. Luan J-b, Xu J, Lin K-k, Zalucki MP, Liu S-s. Species exclusion between an invasive and  
799 an indigenous whitefly on host plants with differential levels of suitability. *Journal of*  
800 *Integrative Agriculture*. 2012;11(2):215-24.
- 801 101. Tajebe LS, Boni SB, Guastella D, Cavalieri V, Lund OS, Rugumamu CP, et al. Abundance,  
802 diversity and geographic distribution of cassava mosaic disease pandemic-associated  
803 *Bemisia tabaci* in Tanzania. *Journal of Applied Entomology*. 2015;139(8):627-37.
- 804 102. Vyskočilová S, Seal S, Colvin J. Relative polyphagy of "Mediterranean" cryptic *Bemisia*  
805 *tabaci* whitefly species and global pest status implications. *Journal of Pest Science*.  
806 2019;92(3):1071-88.
- 807 103. Milenovic M, Wosula EN, Rapisarda C, Legg JP. Impact of host plant species and whitefly  
808 species on feeding behavior of *Bemisia tabaci*. *Frontiers in Plant Science*. 2019;10(1):1.
- 809 104. Wilson AK. *Euphorbia heterophylla*: A review of distribution, importance and control.  
810 *Tropical Pest Management*. 1981;27:32-8.
- 811 105. Sottoriva LDM, Lourenção AL, Colombo CA. Performance of *Bemisia tabaci* (Genn.)  
812 biotype B (Hemiptera: Aleyrodidae) on weeds. *Neotropical Entomology*. 2014;43(6):574-  
813 81.
- 814 106. Barreto SS, Hallwass M, Aquino OM, Inoue-Nagata AK. A study of weeds as potential  
815 inoculum sources for a tomato-infecting begomovirus in central Brazil. *Phytopathology*.  
816 2013;103(5):436-44. Epub 2013/03/16.



- 817 107. Mar TB, Mendes IR, Lau D, Fiallo-Olive E, Navas-Castillo J, Alves MS, et al. Interaction  
818 between the New World begomovirus *Euphorbia yellow mosaic virus* and its associated  
819 alphasatellite: effects on infection and transmission by the whitefly *Bemisia tabaci*. Journal  
820 of General Virology. 2017;98(6):1552-62. Epub 2017/06/08.
- 821 108. Hadjistylli M, Roderick GK, Brown JK. Global population structure of a worldwide pest  
822 and virus vector: Genetic diversity and population history of the *Bemisia tabaci* sibling  
823 species group. PloS one. 2016;11(11):e0165105.

824 **Table 1.** Sampled sites and whiteflies species detected in cassava in Brazil.

| Sample | Date of collection | Location               | Region    | Geographical coordinates |                 | Number of samples |        |       | Whiteflies species <sup>&amp;</sup> | Reference  |
|--------|--------------------|------------------------|-----------|--------------------------|-----------------|-------------------|--------|-------|-------------------------------------|------------|
|        |                    |                        |           | Latitude                 | Longitude       | Adults            | Nymphs | Total |                                     |            |
| AL1    | July 2018          | Arapiraca, AL          | Northeast | 09° 48' 27.66"S          | 36° 36' 40.68"W | 15                | 15     | 30    | Btu, Ta                             | This study |
| AL2    | April 2018         | TeotônioVilela, AL     | Northeast | 09° 53' 16.86"S          | 36° 23' 05.52"W | 14                | 15     | 29    | BtM, Btu, Ta                        | This study |
| AL3    | April 2018         | União dos Palmares, AL | Northeast | 09° 11' 51.84"S          | 36° 01' 51.90"W | 16                | 15     | 31    | BtM, Ta                             | This study |
| AL4    | April 2018         | Arapiraca, AL          | Northeast | 09° 47' 29.46"S          | 36° 25' 36.00"W | 15                | 15     | 30    | BtM, BtNW, Btu, Ta                  | This study |
| AL5    | April 2018         | Arapiraca, AL          | Northeast | 09° 43' 09.30"S          | 36° 40' 45.60"W | 14                | 10     | 24    | BtM, BtNW, Btu, Ta                  | This study |
| BA1    | December 2017      | Barra, BA              | Northeast | 11° 20' 52.37"S          | 43° 12' 57.44"W | 28                | 0      | 28    | BtM, Btu, Ta                        | This study |
| BA2    | March 2018         | LEM, BA                | Northeast | 12° 20' 10.00"S          | 45° 49' 12.00"W | 13                | 0      | 13    | BtM, Ta                             | This study |
| BA3    | March 2018         | Wanderley, BA          | Northeast | 12° 13' 42.04"S          | 43° 55' 50.00"W | 10                | 10     | 20    | BtM, Btu                            | This study |
| BA4    | June 2018          | Cristópolis, BA        | Northeast | 12° 13' 56.08"S          | 44° 23' 11.50"W | 14                | 0      | 14    | BtM, Ta                             | This study |
| DF1    | March 2018         | Planaltina, DF         | Midwest   | 15° 30' 59.00"S          | 47° 16' 09.00"W | 10                | 0      | 10    | BtM                                 | This study |
| DF2    | March 2018         | Planaltina, DF         | Midwest   | 15° 28' 57.00"S          | 47° 20' 06.00"W | 10                | 0      | 10    | BtM                                 | This study |
| DF3    | March 2021         | Planaltina, DF         | Midwest   | 15° 31' 17.00"S          | 47° 21' 22.00"W | 10                | 0      | 10    | BtM                                 | This study |
| ES1    | January 2018       | Sooretama, ES          | Southeast | 19° 06' 52.02"S          | 40° 04' 46.30"W | 14                | 15     | 29    | BtM, Ta                             | This study |
| ES2    | January 2018       | Marilândia, ES         | Southeast | 19° 24' 22.04"S          | 40° 32' 21.70"W | 15                | 15     | 30    | BtM, Btu, Ta                        | This study |
| ES3    | January 2018       | Pinheiros, ES          | Southeast | 18° 40' 83.20"S          | 40° 28' 63.40"W | 11                | 11     | 22    | Ta                                  | This study |
| GO1    | March 2018         | Bela Vista, GO         | Midwest   | 16° 59' 50.00"S          | 48° 57' 56.00"W | 10                | 11     | 21    | BtM                                 | This study |
| GO2    | March 2018         | Itaberaí, GO           | Midwest   | 15° 56' 58.00"S          | 49° 47' 07.00"W | 15                | 15     | 30    | BtM, Btu                            | This study |
| MG1    | May 2018           | Ouro Fino, MG          | Southeast | 22° 16' 44.00"S          | 46° 29' 33.00"W | 12                | 10     | 22    | Ta                                  | This study |
| MG10   | February 2018      | Florestal, MG          | Southeast | 19° 52' 38.00"S          | 44° 25' 21.00"W | 15                | 15     | 30    | Btu, Ta                             | This study |
| MG11   | March 2018         | Florestal, MG          | Southeast | 19° 52' 38.00"S          | 44° 25' 21.00"W | 15                | 15     | 30    | Btu, Ta                             | This study |
| MG12   | May 2018           | Divinópolis, MG        | Southeast | 20° 06' 21.00"S          | 44° 55' 36.00"W | 15                | 15     | 30    | Btu, Ta                             | This study |
| MG13   | August 2018        | Viçosa, MG             | Southeast | 20° 46' 06.00"S          | 42° 52' 14.00"W | 17                | 0      | 17    | Btu, Ta                             | This study |
| MG14   | March 2018         | Piraúba, MG            | Southeast | 21° 16' 22.71"S          | 43° 02' 31.28"W | 10                | 10     | 20    | Ta                                  | This study |
| MG15   | March 2018         | Descoberto, MG         | Southeast | 21° 28' 06.28"S          | 42° 58' 05.53"W | 10                | 10     | 20    | Ta                                  | This study |
| MG16   | March 2018         | Mar de Espanha, MG     | Southeast | 21° 46' 07.26"S          | 43° 04' 26.62"W | 15                | 15     | 30    | BtM, Ta                             | This study |

|      |               |                            |           |                 |                 |    |    |    |                    |            |
|------|---------------|----------------------------|-----------|-----------------|-----------------|----|----|----|--------------------|------------|
| MG17 | March 2018    | Leopoldina, MG             | Southeast | 21° 33' 50.15"S | 42° 40' 42.97"W | 16 | 13 | 29 | BtM, Btu, Ta       | This study |
| MG18 | March 2018    | Dona Euzébia, MG           | Southeast | 21° 19' 18.83"S | 42° 48' 37.07"W | 15 | 14 | 29 | Ta                 | This study |
| MG19 | February 2018 | Caparaó, MG                | Midwest   | 20° 31' 48.00"S | 41° 54' 00.36"W | 15 | 15 | 30 | BtM, Ta            | This study |
| MG2  | July 2018     | Pouso Alegre, MG           | Southeast | 22° 15' 01.00"S | 46° 58' 31.00"W | 9  | 0  | 9  | Ta                 | This study |
| MG3  | February 2018 | Careçu, MG                 | Southeast | 22° 04' 37.00"S | 45° 41' 49.00"W | 11 | 11 | 22 | Ta                 | This study |
| MG4  | June 2018     | Lambari, MG                | Southeast | 21° 56' 05.00"S | 45° 15' 49.00"W | 15 | 15 | 30 | Btu, Ta            | This study |
| MG5  | February 2018 | Lima Duarte, MG            | Southeast | 21° 50' 35.00"S | 43° 47' 01.00"W | 10 | 10 | 20 | Ta                 | This study |
| MG6  | April 2018    | RioPomba, MG               | Southeast | 21° 15' 50.00"S | 43° 09' 59.00"W | 10 | 0  | 10 | WtNEW2, Btu        | This study |
| MG7  | February 2018 | Florestal, MG              | Southeast | 19° 54' 13.00"S | 44° 25' 48.00"W | 15 | 15 | 30 | BtM, Btu, Ta       | This study |
| MG8  | February 2018 | Florestal, MG              | Southeast | 19° 51' 20.00"S | 44° 23' 58.00"W | 15 | 15 | 30 | Btu, Btu-like      | This study |
| MG9  | March 2018    | Florestal, MG              | Southeast | 19° 53' 39.00"S | 44° 24' 55.00"W | 14 | 11 | 25 | BtM, BtNW, Btu, Ta | This study |
| MT1  | December 2017 | Canarana, MT               | Midwest   | 13° 31' 16.00"S | 52° 25' 03.00"W | 15 | 16 | 31 | WtNEW1             | This study |
| MT2  | December 2017 | Canarana, MT               | Midwest   | 13° 33' 47.00"S | 52° 15' 53.00"W | 0  | 20 | 20 | Btu                | This study |
| MT4  | January 2018  | Pedra Preta, MT            | Midwest   | 16° 38' 29.00"S | 54° 25' 41.00"W | 10 | 10 | 20 | Btu                | This study |
| MT5  | January 2018  | Pedra Preta, MT            | Midwest   | 16° 39' 07.00"S | 54° 22' 27.00"W | 10 | 10 | 20 | BtM, Btu           | This study |
| MT6  | January 2018  | Pedra Preta, MT            | Midwest   | 16° 39' 28.00"S | 54° 20' 20.00"W | 10 | 10 | 20 | BtM, Btu           | This study |
| PA1  | January 2018  | Brasil Novo, PA            | North     | 03° 12' 23.07"S | 52° 30' 13.80"W | 15 | 15 | 30 | Btu, Ta            | This study |
| PA2  | January 2018  | Vitória doXingu, PA        | North     | 03° 04' 51.01"S | 52° 10' 08.80"W | 15 | 16 | 31 | Btu, Ta            | This study |
| PA3  | August 2018   | Altamira, PA               | North     | 03° 18' 15.03"S | 52° 07' 26.00"W | 10 | 10 | 20 | BtM                | This study |
| PA4  | January 2018  | Altamira, PA               | North     | 03° 09' 14.60"S | 52° 07' 49.00"W | 11 | 10 | 21 | Ta                 | This study |
| PA5  | January 2018  | Belém, PA                  | North     | 01° 18' 20.00"S | 48° 26' 46.00"W | 10 | 12 | 22 | Ta                 | This study |
| PI1  | April 2018    | Picos, PI                  | Northeast | 07° 04' 79.50"S | 41° 25' 57.80"W | 0  | 29 | 29 | Btu, Ta            | This study |
| PI2  | May 2018      | Teresina, PI               | Northeast | 05° 02' 41.94"S | 42° 47' 18.84"W | 0  | 27 | 27 | Btu, Ta            | This study |
| PR1  | March 2018    | Santo Antônio do Caiuá, PR | South     | 22° 41' 07.00"S | 52° 19' 06.00"W | 30 | 0  | 30 | Btu, Ta            | This study |
| PR2  | March 2018    | Santo Antônio do Caiuá, PR | South     | 22° 49' 03.00"S | 52° 21' 25.00"W | 30 | 0  | 30 | BtM, Btu           | This study |
| PR3  | March 2018    | Paranavaí, PR              | South     | 23° 06' 03.29"S | 52° 29' 10.00"W | 10 | 10 | 20 | BtM, BtMED         | This study |
| PR4  | March 2018    | Sertãoópolis, PR           | South     | 23° 02' 54.00"S | 50° 59' 54.00"W | 26 | 0  | 26 | Btu, Ta            | This study |

|              |               |                        |           |                 |                 |     |     |      |                 |                     |
|--------------|---------------|------------------------|-----------|-----------------|-----------------|-----|-----|------|-----------------|---------------------|
| SC2          | March 2018    | Agrônoma, SC           | South     | 27° 34' 40.00"S | 48° 32' 08.00"W | 10  | 0   | 10   | BtM             | This study          |
| SP1          | July 2016     | Holambra, SP           | Southeast | 22° 36' 26.00"S | 47° 02' 50.00"W | 10  | 0   | 10   | Btu             | Moraes et al., 2018 |
| SP10         | March 2016    | Casa Branca, SP        | Southeast | 21° 49' 08.00"S | 45° 58' 23.00"W | 10  | 0   | 10   | BtM             | Moraes et al., 2018 |
| SP10         | July 2016     | São Pedro do Turvo, SP | Southeast | 22° 36' 32.00"S | 49° 45' 29.00"W | 10  | 0   | 10   | BtMED           | Moraes et al., 2018 |
| SP11         | July 2016     | Oleo, SP               | Southeast | 22° 56' 32.00"S | 49° 26' 15.00"W | 10  | 0   | 10   | Btu             | Moraes et al., 2018 |
| SP12         | July 2016     | Mogi Mirim, SP         | Southeast | 22° 28' 32.30"S | 47° 00' 47.60"W | 10  | 0   | 10   | Btu             | Moraes et al., 2018 |
| SP2          | July 2016     | Mogi Mirim, SP         | Southeast | 22° 28' 08.00"S | 46° 56' 25.00"W | 10  | 0   | 10   | Btu             | Moraes et al., 2018 |
| SP3          | July 2016     | Mogi Mirim, SP         | Southeast | 22° 24' 59.00"S | 46° 59' 19.00"W | 10  | 0   | 10   | Btu             | Moraes et al., 2018 |
| SP4          | February 2019 | Mogi Mirim, SP         | Southeast | 22° 26' 44.00"S | 47° 04' 11.00"W | 5   | 5   | 10   | Btu             | This study          |
| SP5          | July 2017     | Mogi Mirim, SP         | Southeast | 22° 27' 05.00"S | 47° 04' 56.00"W | 10  | 0   | 10   | Btu             | Moraes et al., 2018 |
| SP6          | January 2019  | São Pedro, SP          | Southeast | 22° 34' 08.00"S | 48° 05' 22.00"W | 10  | 0   | 10   | BtMED           | This study          |
| SP7          | July 2017     | Montalvão, SP          | Southeast | 22° 02' 23.00"S | 51° 19' 53.00"W | 10  | 0   | 10   | BtM             | Moraes et al., 2018 |
| SP8          | July 2016     | Pindamonhangaba, SP    | Southeast | 22° 56' 05.00"S | 45° 26' 25.00"W | 10  | 0   | 10   | Btu             | Moraes et al., 2018 |
| SP9          | January 2019  | Casa Branca, SP        | Southeast | 21° 11' 32.00"S | 47° 48' 44.00"W | 4   | 10  | 14   | BtM, Btu, BtMED | This study          |
| <b>Total</b> |               |                        |           |                 |                 | 819 | 566 | 1385 |                 |                     |

825 \* Brazilian states where samples were collected: AL, Alagoas; BA, Bahia; DF, Distrito Federal; ES, Espírito Santo; GO, Goiás; MG, Minas Gerais; MT, Mato

826 Grosso; PA, Pará; PI, Piauí; PR, Paraná; SC, Santa Catarina; SP, São Paulo.

827 & Btu, *Bemisia tuberculata*; BtM, *Bemisia tabaci* MEAM1; BtMED, *B. tabaci* MED; BtNW, *B. tabaci* NW; Ta, *Tetraleuroides acaciae*; WtNEW2, whitefly new

828 specie 1; WtNEW2, whitefly new specie 2.

829 **Figure legends**

830 **Figure 1. A.** Clockwise from top-left: Adults and nymphs of *Bemisia tuberculata* colonizing  
831 cassava in Mogi Mirim, São Paulo state. Growth of sooty mould fungus on the leaf surface due to  
832 the deposition of honeydew by whiteflies. Presence of begomovirus-infected *Blainvillea*  
833 *rhomboidea* (family Asteraceae) in a cassava field in Minas Gerais state. Presence of begomovirus-  
834 infected *Euphorbia heterophylla* (family Euphorbiaceae) in a cassava field in Minas Gerais state.  
835 **B.** Map of Brazil showing the locations where whiteflies samples were collected. The map is  
836 colored according to the regions as indicated in the legend. Black dots correspond to the sampled  
837 sites. Scale bar is only for Brazil map. **C.** Number of adults and nymphs analyzed from each  
838 sampled site according to state. **D.** Species distribution according to region. AL, Alagoas; BA,  
839 Bahia; DF, Distrito Federal; ES, Espírito Santo; GO, Goiás; MG, Minas Gerais; MT, Mato Grosso;  
840 PA, Pará; PiauÍ; PR, Paraná; SC, Santa Catarina; SP, São Paulo.

841 **Figure 2.** Bayesian phylogenetic tree based on partial nucleotide sequences of the mitochondrial  
842 cytochrome oxidase (mtCOI) gene of representative individuals of each whitefly species detected  
843 in this study and reference sequences retrieved from GenBank. The tree was rooted with the aphid  
844 *Aphis gossypii*. Bayesian posterior probabilities are shown at the nodes. The scale bar represents  
845 the number of nucleotide substitutions per site. Nodes with posterior probability values between  
846 0.60 and 0.80 are indicated by empty circles and nodes with values equal to or greater than 0.81  
847 are indicated by filled circles. Clades highlighted with different colors indicate the species detected  
848 in this study. Branches highlighted in red indicate the putative new species detected here.

849 **Figure 3.** Composition of whitefly populations colonizing cassava in Brazil. **A.** Species  
850 composition at each sampled site according to stage of development (adult and nymphs). Asterisks

851 indicate that nymphs were not detected. **B, C, D.** Species distribution of the 1,385 individuals  
852 genotyped in this study considering the samples from all sites (**B**) or only samples from sites where  
853 both adults and nymphs were sampled (**C**) or without samples from Minas Gerais state (**D**).

854 **Figure 4. A.** Incidence of *Trialeurodes acaciae*, *Bemisia tuberculata* and *B. tabaci* MEAM1 in  
855 cassava fields in Brazil, measured as the percentage of sampled sites where at least one individual  
856 belonging to each one of the three species was detected. Other species detected at low incidence  
857 are shown together as "others". **B.** Venn diagram showing the proportion of sites where each one  
858 of the three whitefly species occur alone or in different combinations. **C.** Competitive capacity  
859 inferred based on the prevalence of individuals from each of two species in fields where those two  
860 species were detected co-occurring. The horizontal line inside the box corresponds to the median.  
861 The asterisk indicates a significant difference according to the non-parametric Kruskal-Wallis test  
862 ( $p < 0.05$ ).

863 **Figure 5.** Composition and species diversity of whitefly populations differ among Brazilian  
864 regions. **A.** Pie charts represent the distribution of the 1,385 individuals genotyped in this study in  
865 the five geographic regions of Brazil. **B.** Boxplots correspond to Simpson's index of diversity (1-  
866 D) calculated for each geographic region. The index was first calculated for each sampled site and  
867 grouped by geographic region. Different letters indicate significant differences between groups  
868 according to the non-parametric Kruskal-Wallis test followed by *post hoc* multiple comparison  
869 test ( $p < 0.05$ ).

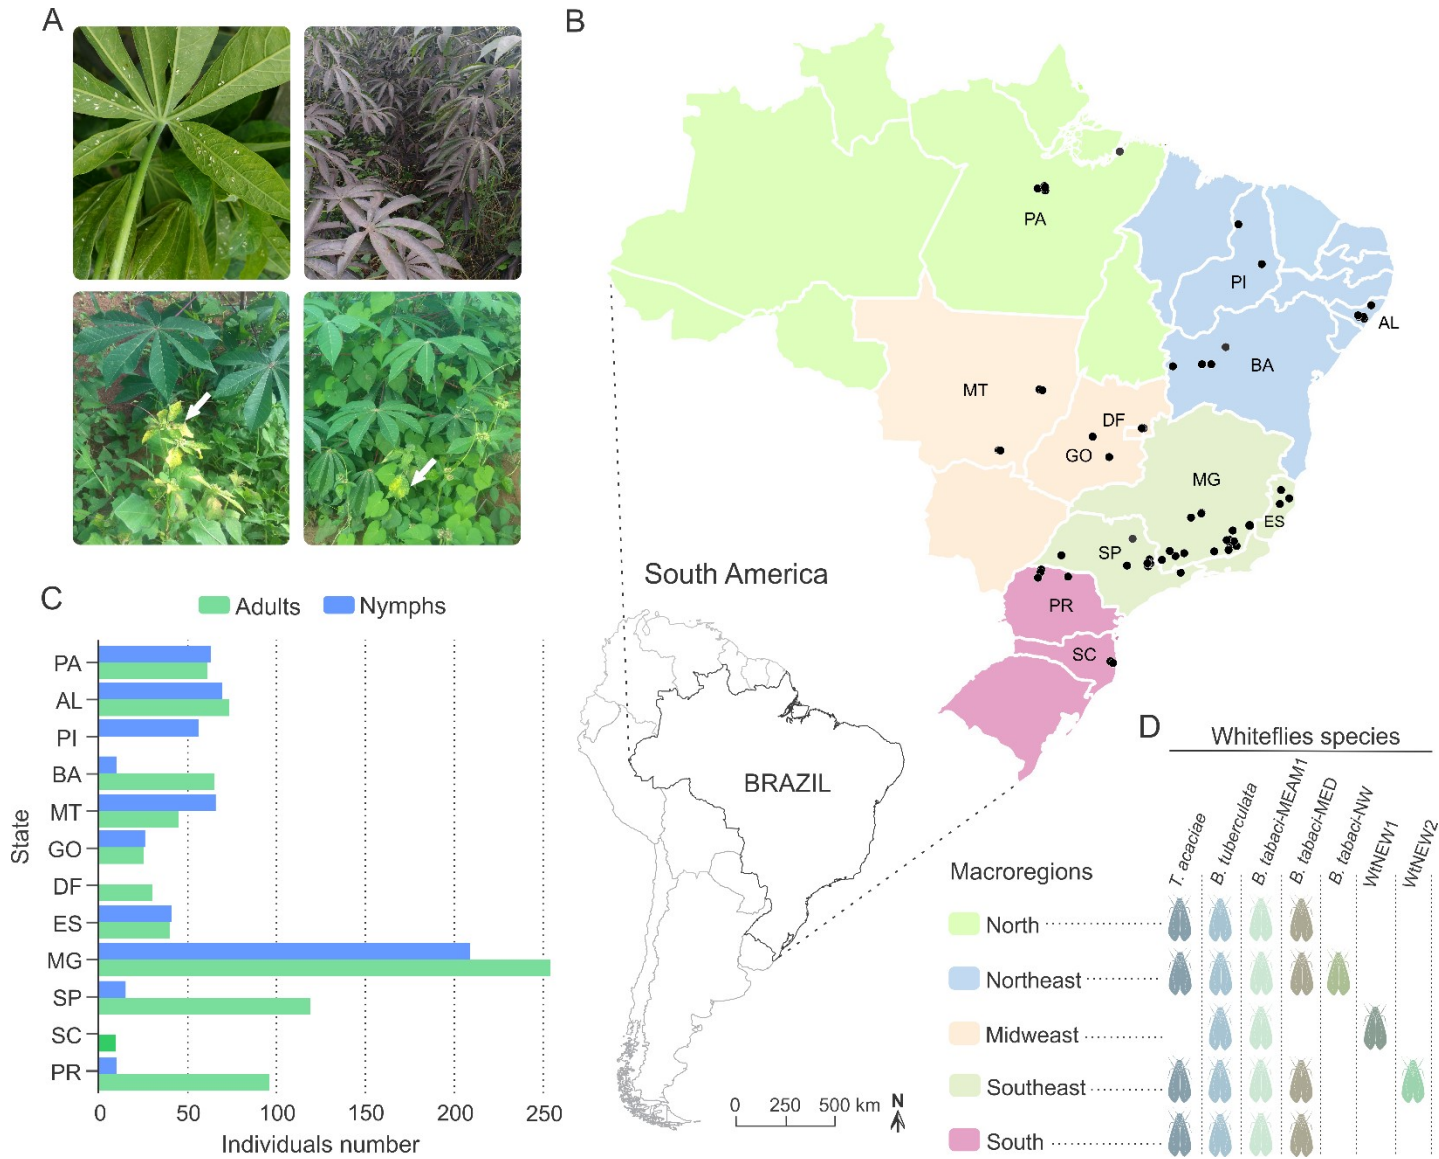

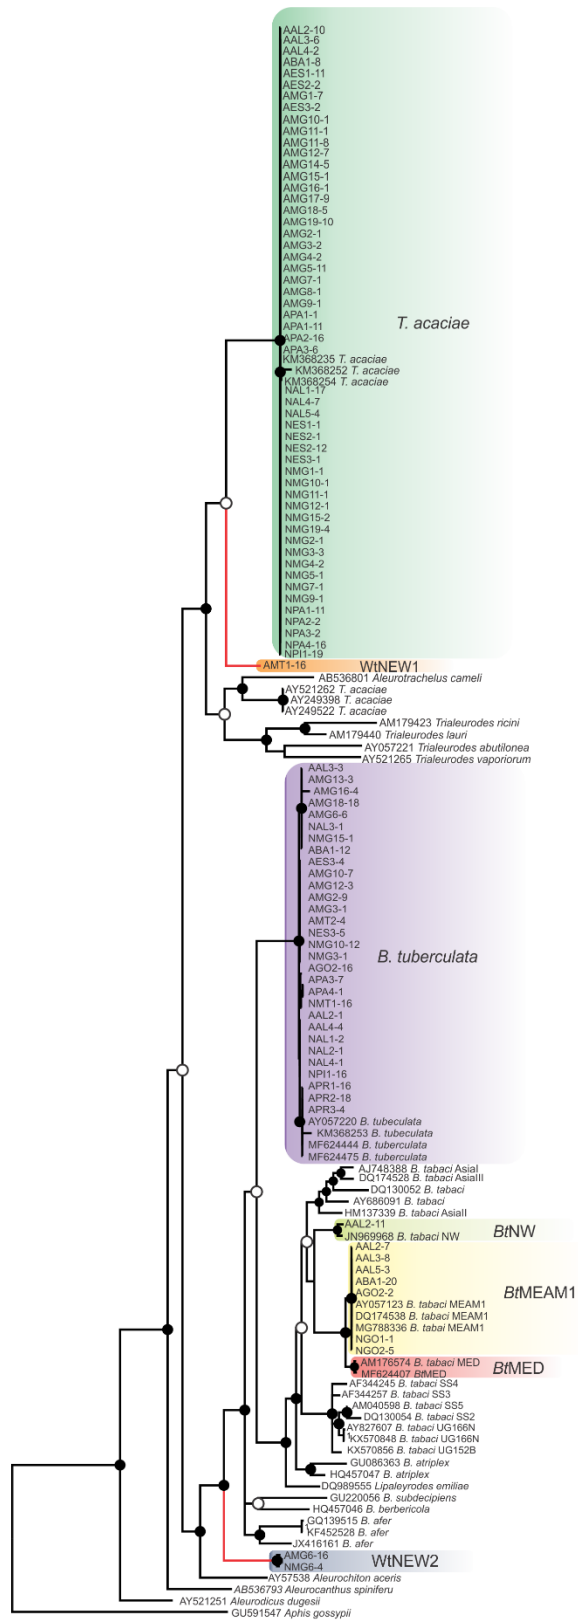



874 **Figure 3**

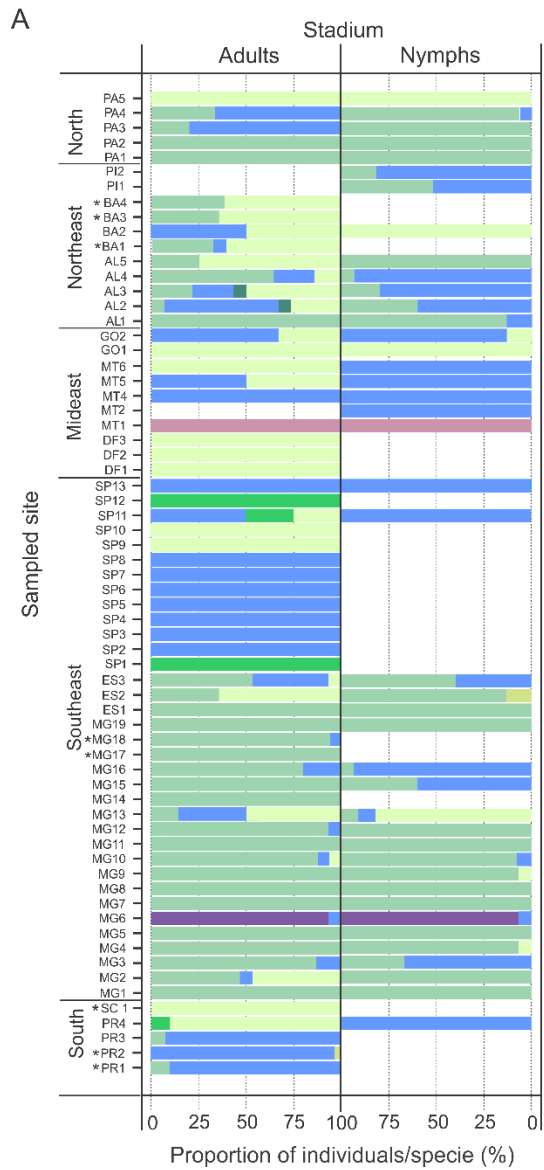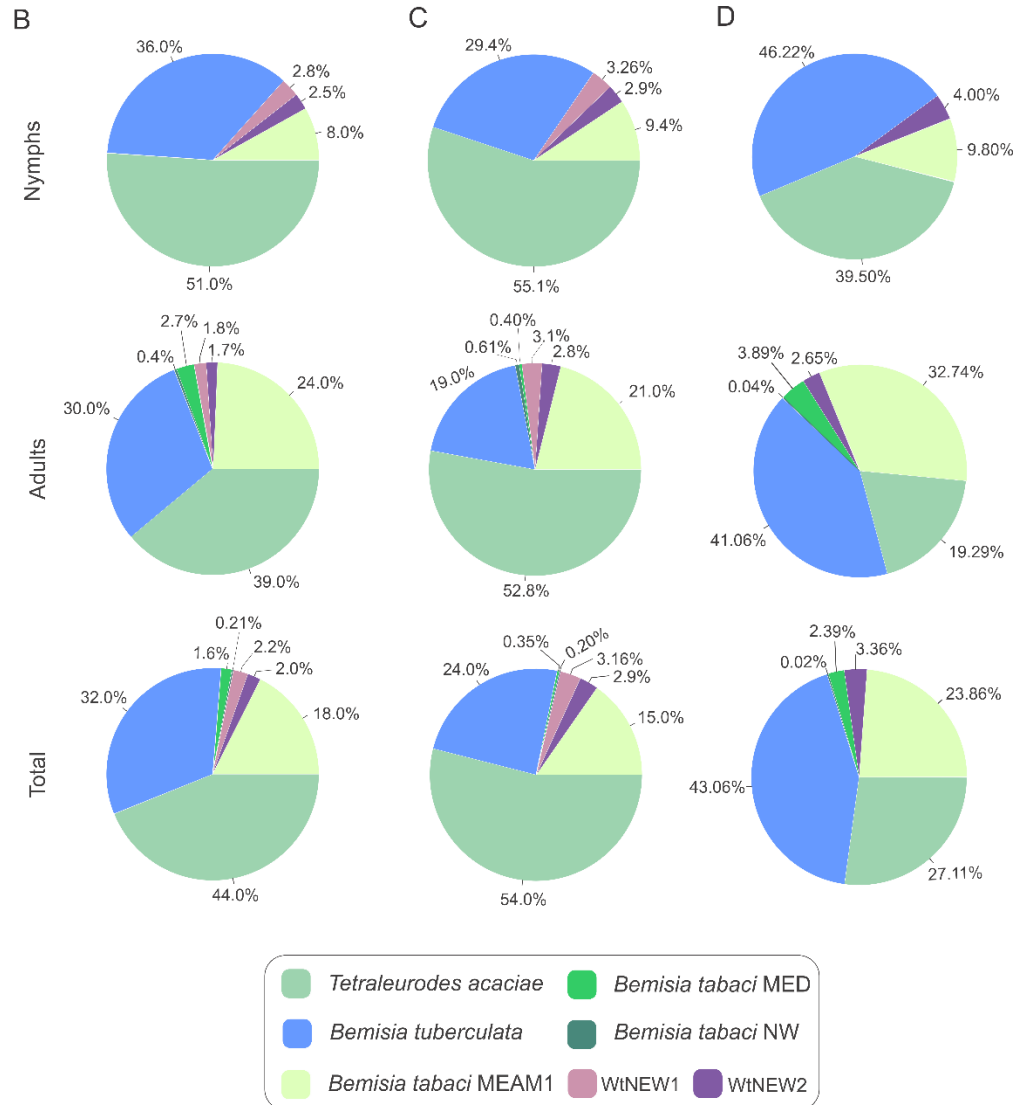

875

876 **Figure 4**

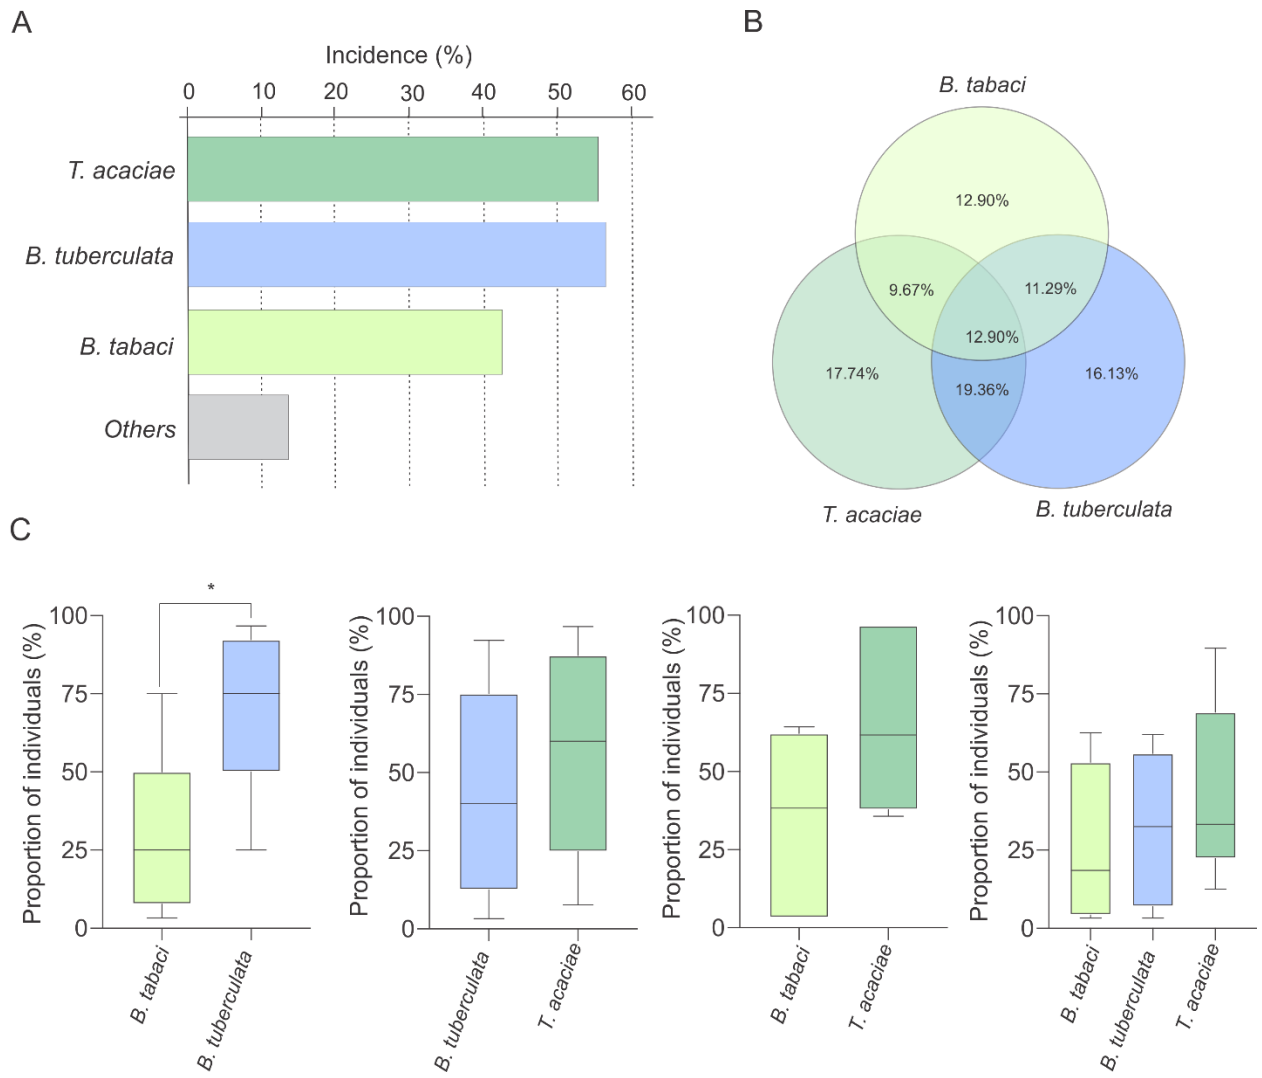

877

878 **Figure 5**

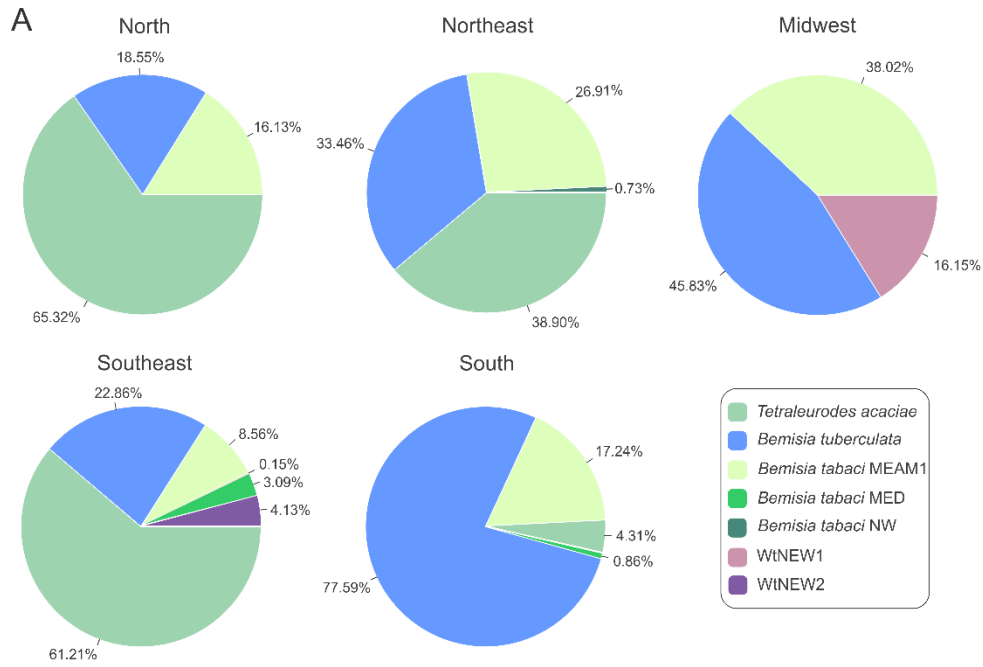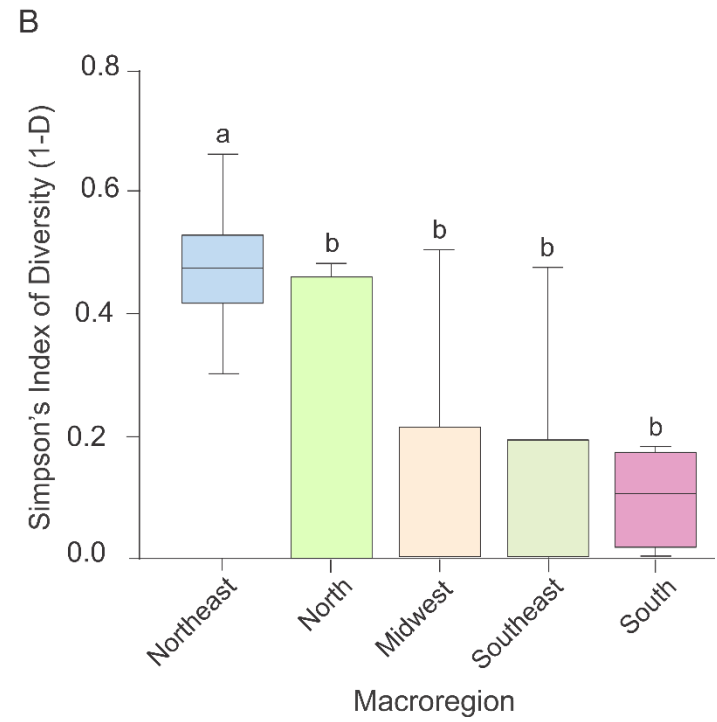

879
